# Supplementary material
Source: publisher figshare collection journal article supplement (https://acs.figshare.com/ndownloader/files/4593172)
Supplement: Supplementary file 1 [file 4593172]

|                                             |                             |
|---------------------------------------------|-----------------------------|
| <b>Protein Name</b>                         | Mapk3 (Erk1)                |
| <b>UniProt ID (IPI)</b>                     | Q63844                      |
| <b>Modified Peptide Sequence identified</b> | IADPEHDHTGFLT(ph)EY(ph)VATR |
| <b>Precursor m/z</b>                        | 777.99428                   |
| <b>Mass error (ppm)</b>                     | -0.11828                    |
| <b>Charge</b>                               | 3                           |
| <b>Mascot Score</b>                         | 24.42                       |
| <b>PTM Score</b>                            | 84.546                      |
| <b>False Positive Rate (FPR)</b>            | 8.46E-08                    |

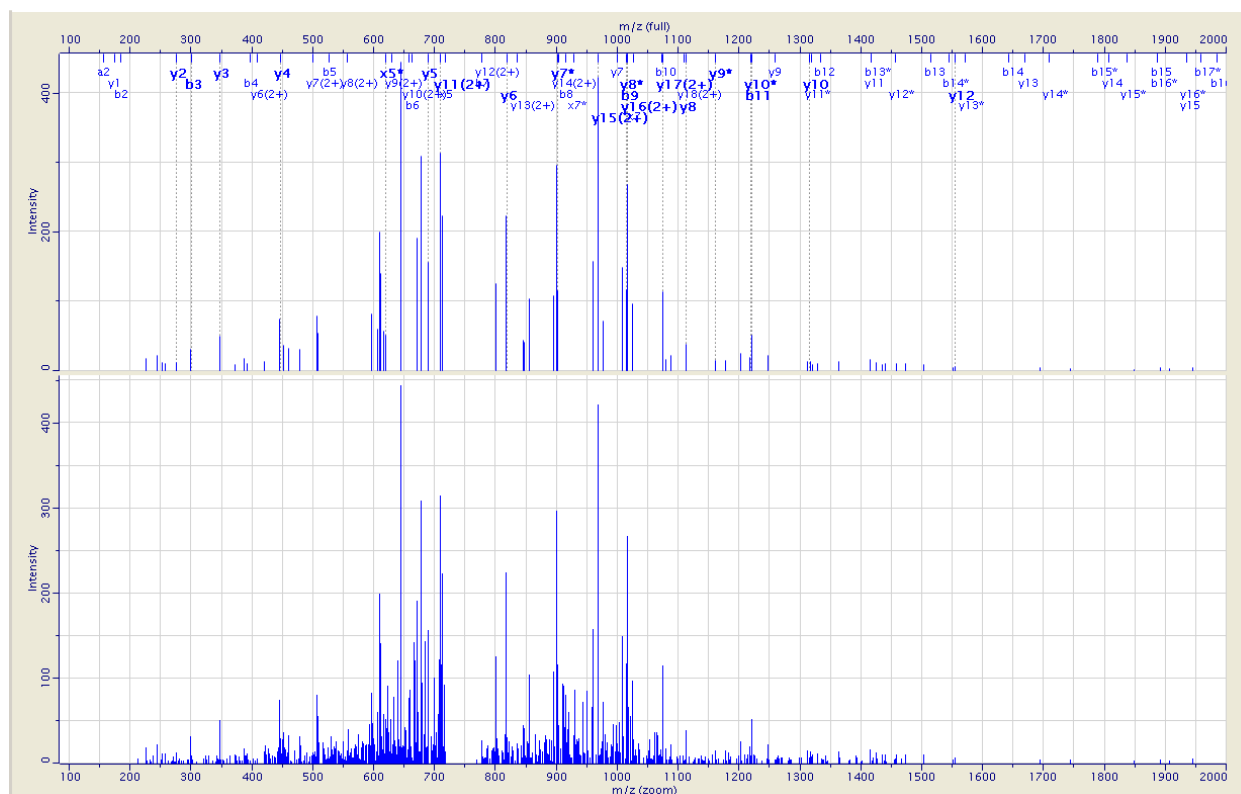

Spectrum as presented by MaxQuant. The lower panel represents the raw spectrum, while the upper one represents the peak list submitted to MASCOT. Ions matched are shown in bold and connected by dashed lines to the corresponding peak. \* neutral loss

|                                             |                             |
|---------------------------------------------|-----------------------------|
| <b>Protein Name</b>                         | Mapk1 (Erk2)                |
| <b>UniProt ID (IPI)</b>                     | P63085                      |
| <b>Modified Peptide Sequence identified</b> | VADPDHDHTGFLT(ph)EY(ph)VATR |
| <b>Precursor m/z</b>                        | 1152.4721                   |
| <b>Mass error (ppm)</b>                     | 0.52464                     |
| <b>Charge</b>                               | 2                           |
| <b>Mascot Score</b>                         | 26.93                       |

|                                  |          |
|----------------------------------|----------|
| <b>PTM Score</b>                 | 130.99   |
| <b>False Positive Rate (FPR)</b> | 2.98E-09 |

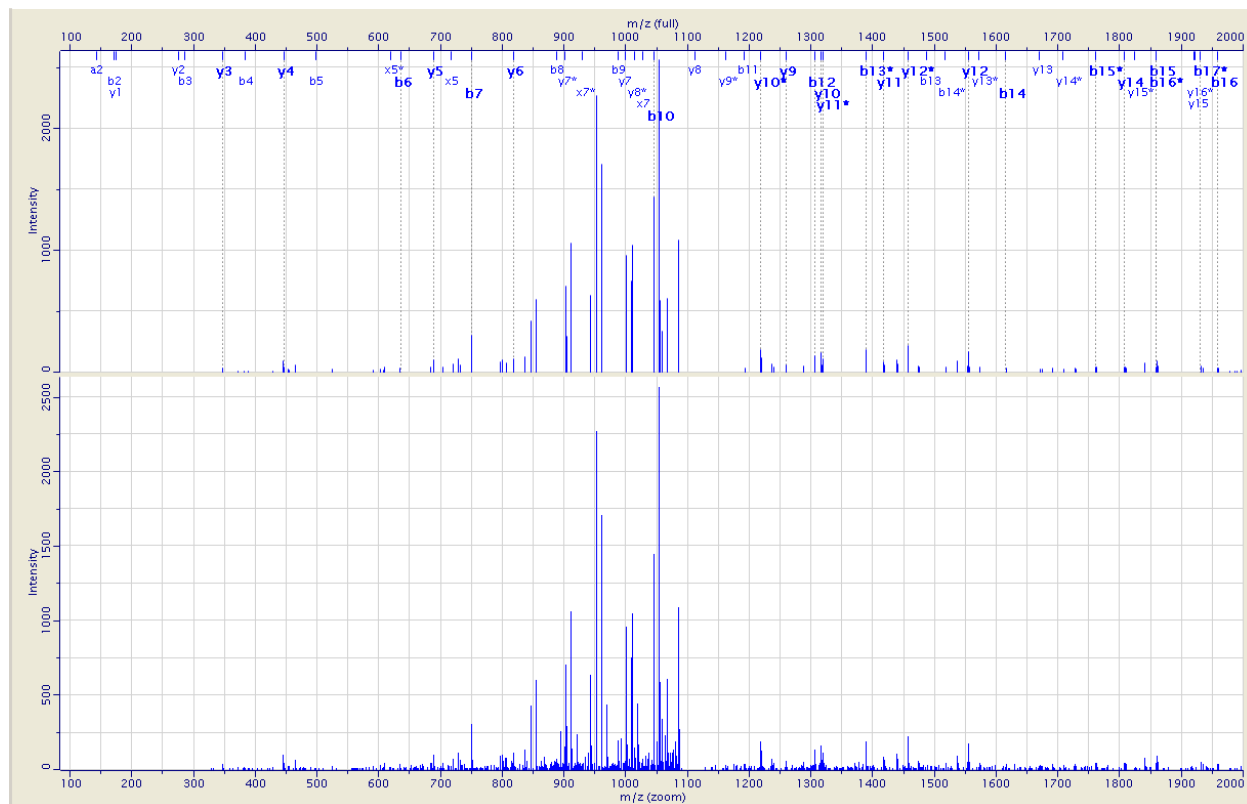

Spectrum as presented by MaxQuant. The lower panel represents the raw spectrum, while the upper one represents the peak list submitted to MASCOT. Ions matched are shown in bold and connected by dashed lines to the corresponding peak. \* neutral loss

|                                             |                                     |
|---------------------------------------------|-------------------------------------|
| <b>Protein Name</b>                         | Frap1 (mTor)                        |
| <b>UniProt ID (IPI)</b>                     | Q9JLN9                              |
| <b>Modified Peptide Sequence identified</b> | TRTDS(ph)YSAGQS(ph)VEILDGVELGEPAAHK |
| <b>Precursor m/z</b>                        | 973.76515                           |
| <b>Mass error (ppm)</b>                     | 0.11362                             |
| <b>Charge</b>                               | 3                                   |
| <b>Mascot Score</b>                         | 23.94                               |
| <b>PTM Score</b>                            | 117.77                              |
| <b>False Positive Rate (FPR)</b>            | 1.33E-14                            |

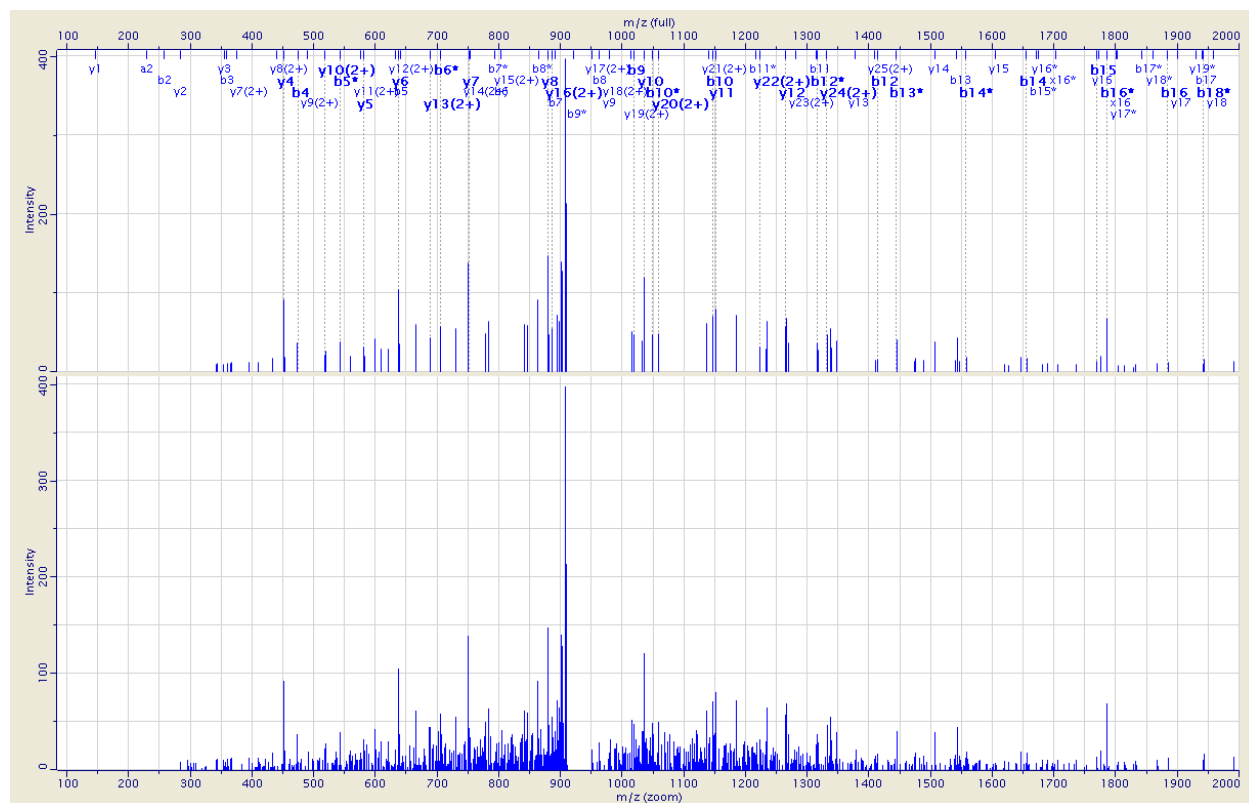

Spectrum as presented by MaxQuant. The lower panel represents the raw spectrum, while the upper one represents the peak list submitted to MASCOT. Ions matched are shown in bold and connected by dashed lines to the corresponding peak. \* neutral loss

|                                             |                     |
|---------------------------------------------|---------------------|
| <b>Protein Name</b>                         | Rps6                |
| <b>UniProt ID (IPI)</b>                     | P62754              |
| <b>Modified Peptide Sequence identified</b> | RLS(ph)S(ph)LRASTSK |
| <b>Precursor m/z</b>                        | 605.26744           |
| <b>Mass error (ppm)</b>                     | 0.019038            |
| <b>Charge</b>                               | 2                   |
| <b>Mascot Score</b>                         | 25.33               |
| <b>PTM Score</b>                            | 115.98              |
| <b>False Positive Rate (FPR)</b>            | 1.40E-03            |

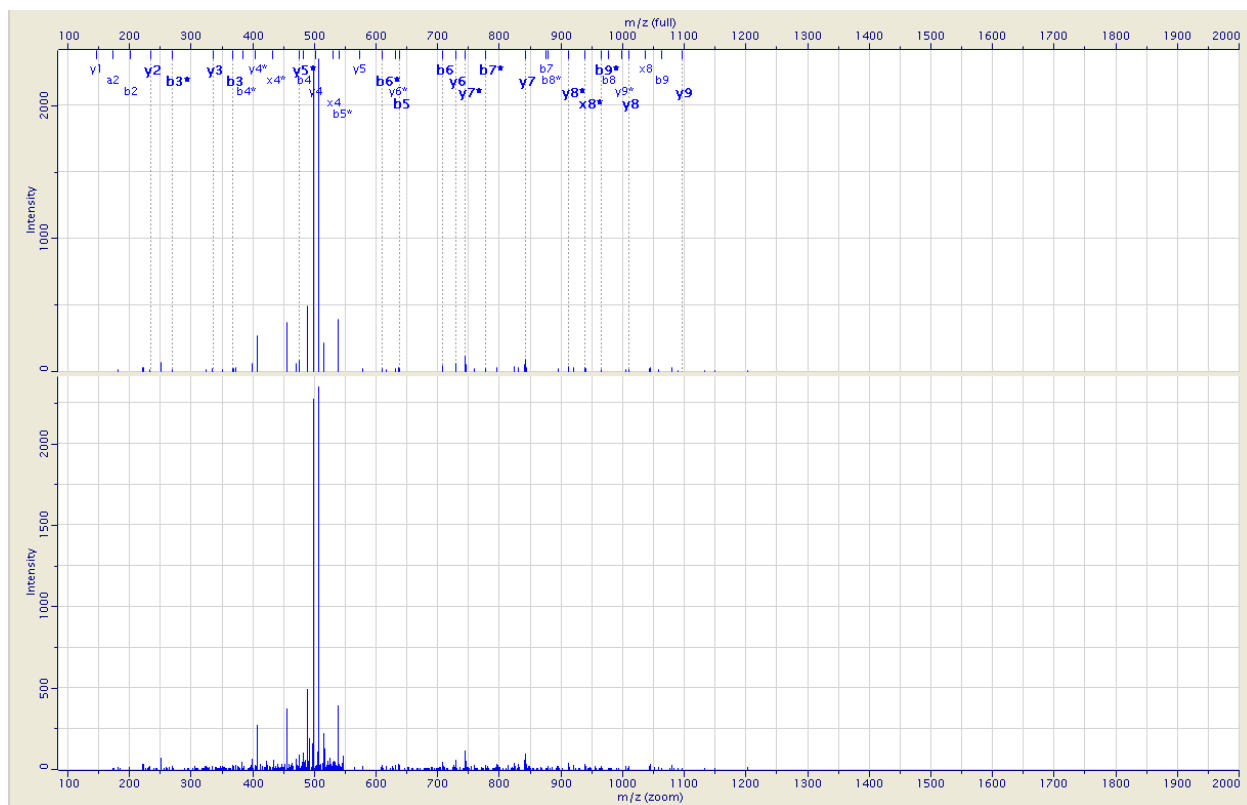

Spectrum as presented by MaxQuant. The lower panel represents the raw spectrum, while the upper one represents the peak list submitted to MASCOT. Ions matched are shown in bold and connected by dashed lines to the corresponding peak. \* neutral loss

|                                             |                            |
|---------------------------------------------|----------------------------|
| <b>Protein Name</b>                         | eif4B                      |
| <b>UniProt ID (IPI)</b>                     | Q8BGD9                     |
| <b>Modified Peptide Sequence identified</b> | SRTGS(ph)ESS(ph)QTGASATSGR |
| <b>Precursor m/z</b>                        | 943.8675                   |
| <b>Mass error (ppm)</b>                     | -0.72373                   |
| <b>Charge</b>                               | 2                          |
| <b>Mascot Score</b>                         | 32.38                      |
| <b>PTM Score</b>                            | 141.3                      |
| <b>False Positive Rate (FPR)</b>            | 4.01E-13                   |

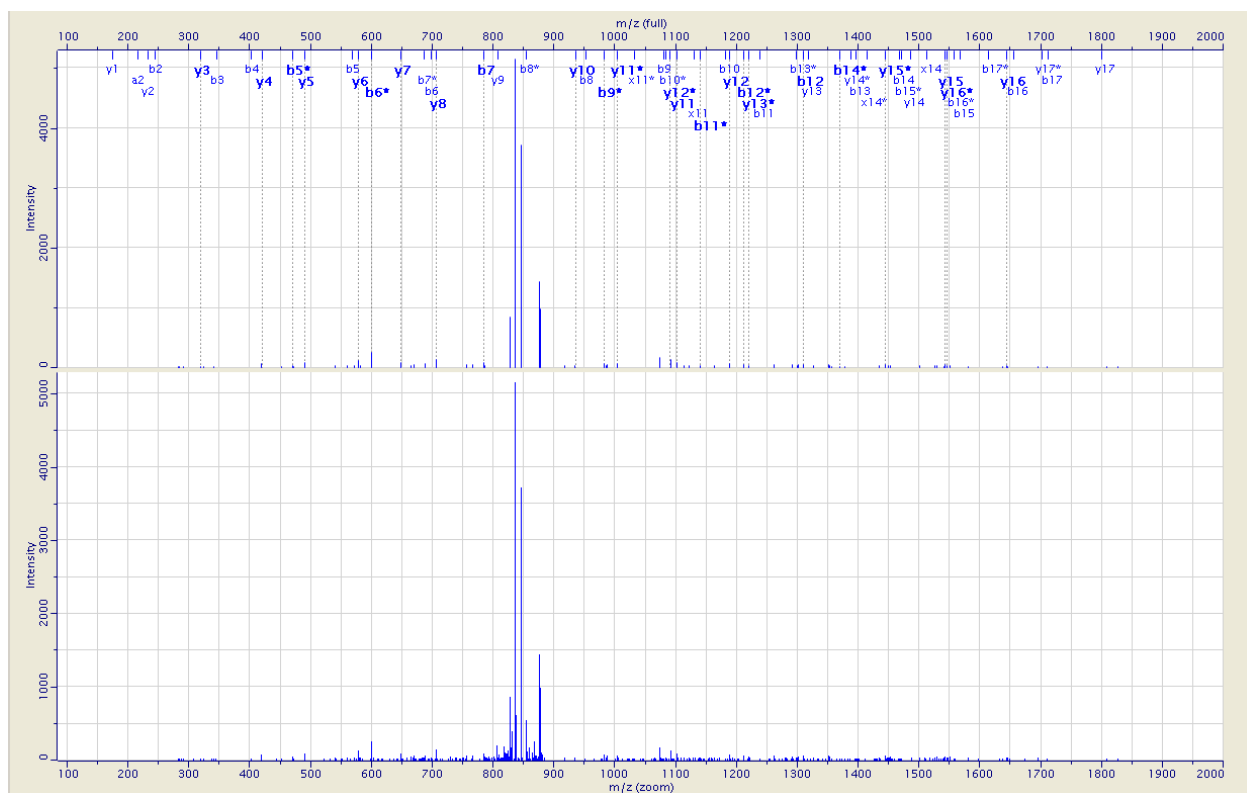

Spectrum as presented by MaxQuant. The lower panel represents the raw spectrum, while the upper one represents the peak list submitted to MASCOT. Ions matched are shown in bold and connected by dashed lines to the corresponding peak. \* neutral loss

|                                             |                 |
|---------------------------------------------|-----------------|
| <b>Protein Name</b>                         | Bad             |
| <b>UniProt ID (IPI)</b>                     | Q61337          |
| <b>Modified Peptide Sequence identified</b> | RMS(ph)DEFEGSFK |
| <b>Precursor m/z</b>                        | 706.78124       |
| <b>Mass error (ppm)</b>                     | 0.54803         |
| <b>Charge</b>                               | 2               |
| <b>Mascot Score</b>                         | 69.2            |
| <b>PTM Score</b>                            | 150.24          |
| <b>False Positive Rate (FPR)</b>            | 1.20E-08        |

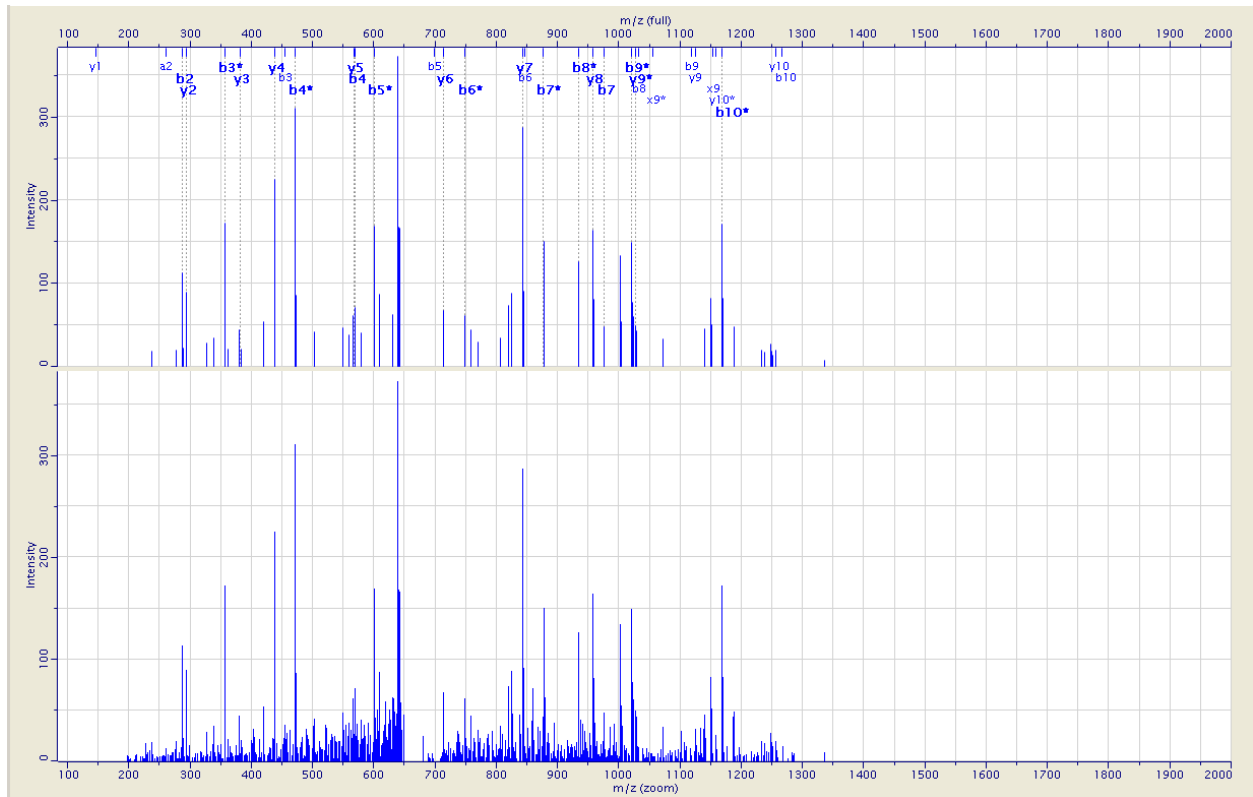

Spectrum as presented by MaxQuant. The lower panel represents the raw spectrum, while the upper one represents the peak list submitted to MASCOT. Ions matched are shown in bold and connected by dashed lines to the corresponding peak. \* neutral loss

|                                             |               |
|---------------------------------------------|---------------|
| <b>Protein Name</b>                         | Gsk3b         |
| <b>UniProt ID (IPI)</b>                     | Q9WV60        |
| <b>Modified Peptide Sequence identified</b> | TTS(ph)FAESCK |
| <b>Precursor m/z</b>                        | 555.7123      |
| <b>Mass error (ppm)</b>                     | 0.60555       |
| <b>Charge</b>                               | 2             |
| <b>Mascot Score</b>                         | 34.34         |
| <b>PTM Score</b>                            | 80.535        |
| <b>False Positive Rate (FPR)</b>            | 7.75E-02      |

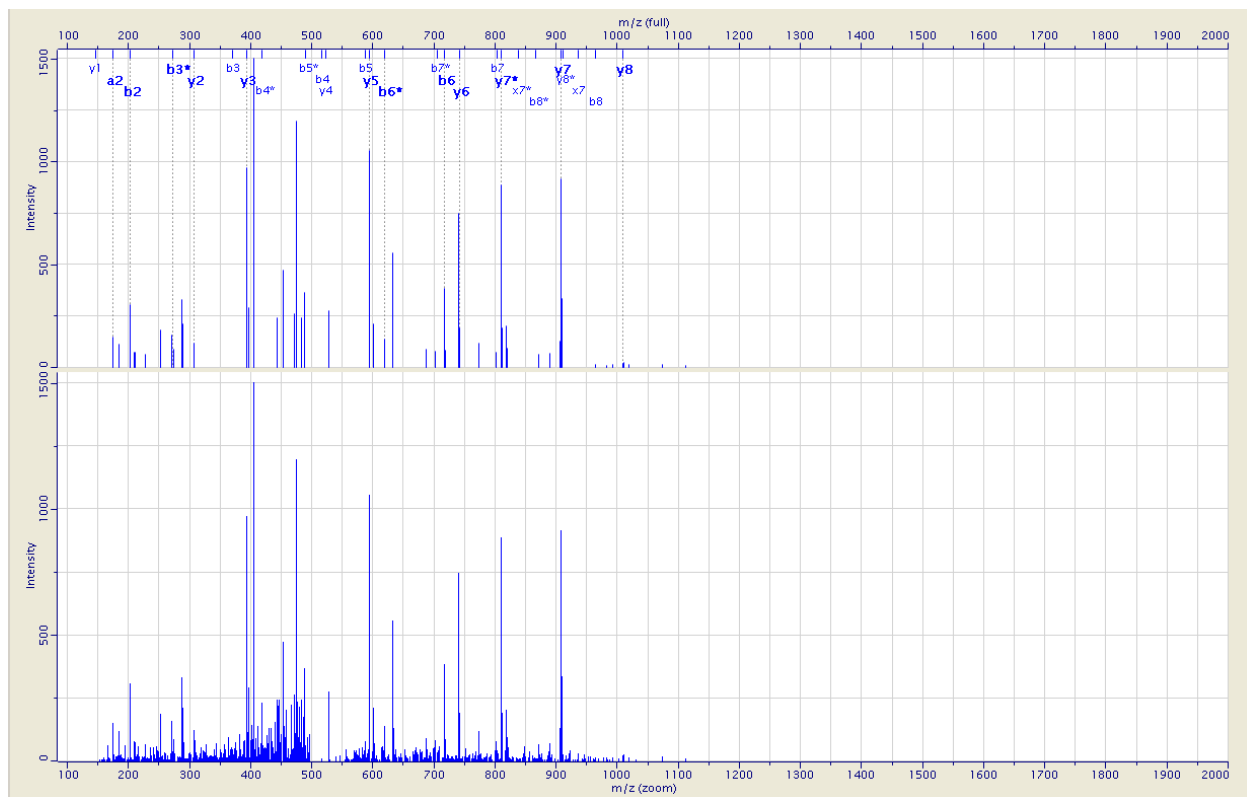

Spectrum as presented by MaxQuant. The lower panel represents the raw spectrum, while the upper one represents the peak list submitted to MASCOT. Ions matched are shown in bold and connected by dashed lines to the corresponding peak. \* neutral loss

|                                             |              |
|---------------------------------------------|--------------|
| <b>Protein Name</b>                         | Jun          |
| <b>UniProt ID (IPI)</b>                     | P05627       |
| <b>Modified Peptide Sequence identified</b> | LAS(ph)PELER |
| <b>Precursor m/z</b>                        | 497.73389    |
| <b>Mass error (ppm)</b>                     | -0.21298     |
| <b>Charge</b>                               | 2            |
| <b>Mascot Score</b>                         | 47.38        |
| <b>PTM Score</b>                            | 114.35       |
| <b>False Positive Rate (FPR)</b>            | 1.22E-02     |

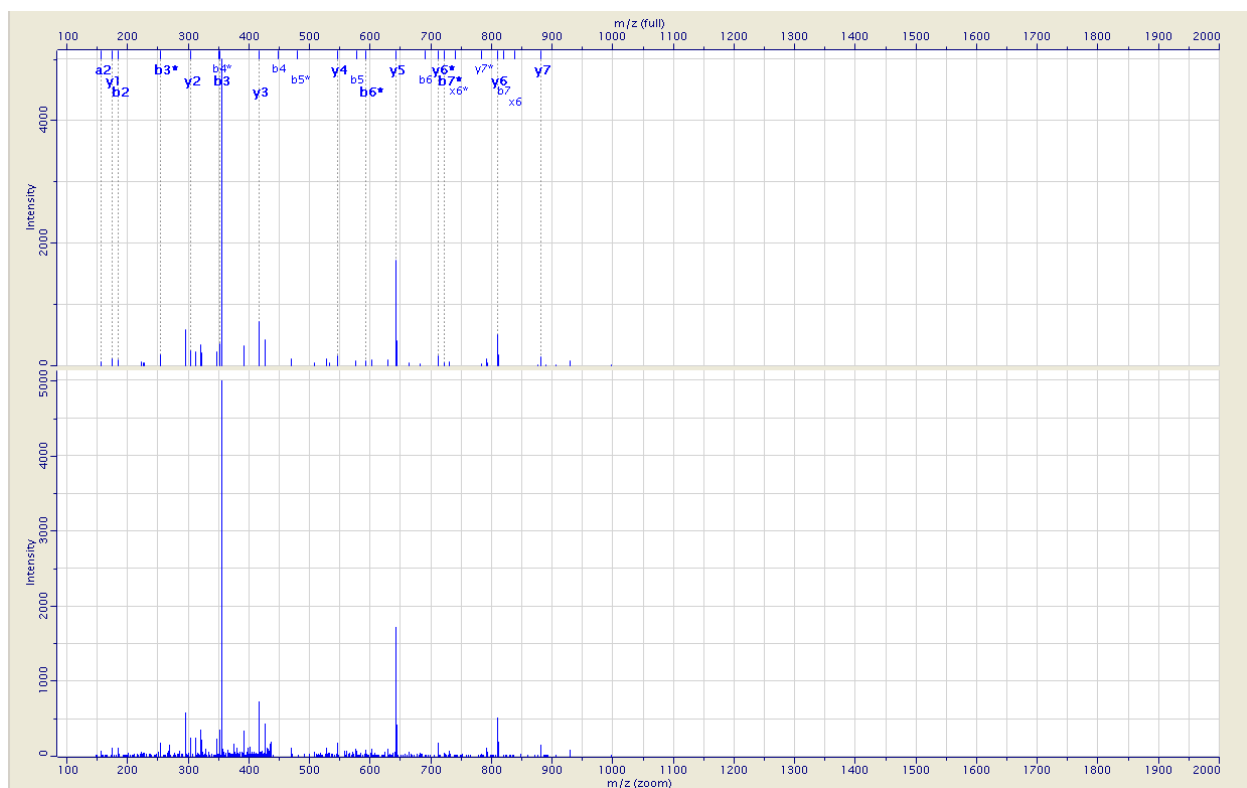

Spectrum as presented by MaxQuant. The lower panel represents the raw spectrum, while the upper one represents the peak list submitted to MASCOT. Ions matched are shown in bold and connected by dashed lines to the corresponding peak. \* neutral loss

|                                             |                |
|---------------------------------------------|----------------|
| <b>Protein Name</b>                         | 4EBP1          |
| <b>UniProt ID (IPI)</b>                     | Q60876         |
| <b>Modified Peptide Sequence identified</b> | NSPVAKT(ph)PPK |
| <b>Precursor m/z</b>                        | 559.78391      |
| <b>Mass error (ppm)</b>                     | 0.0053759      |
| <b>Charge</b>                               | 2              |
| <b>Mascot Score</b>                         | 38.77          |
| <b>PTM Score</b>                            | 133.79         |
| <b>False Positive Rate (FPR)</b>            | 1.57E-04       |



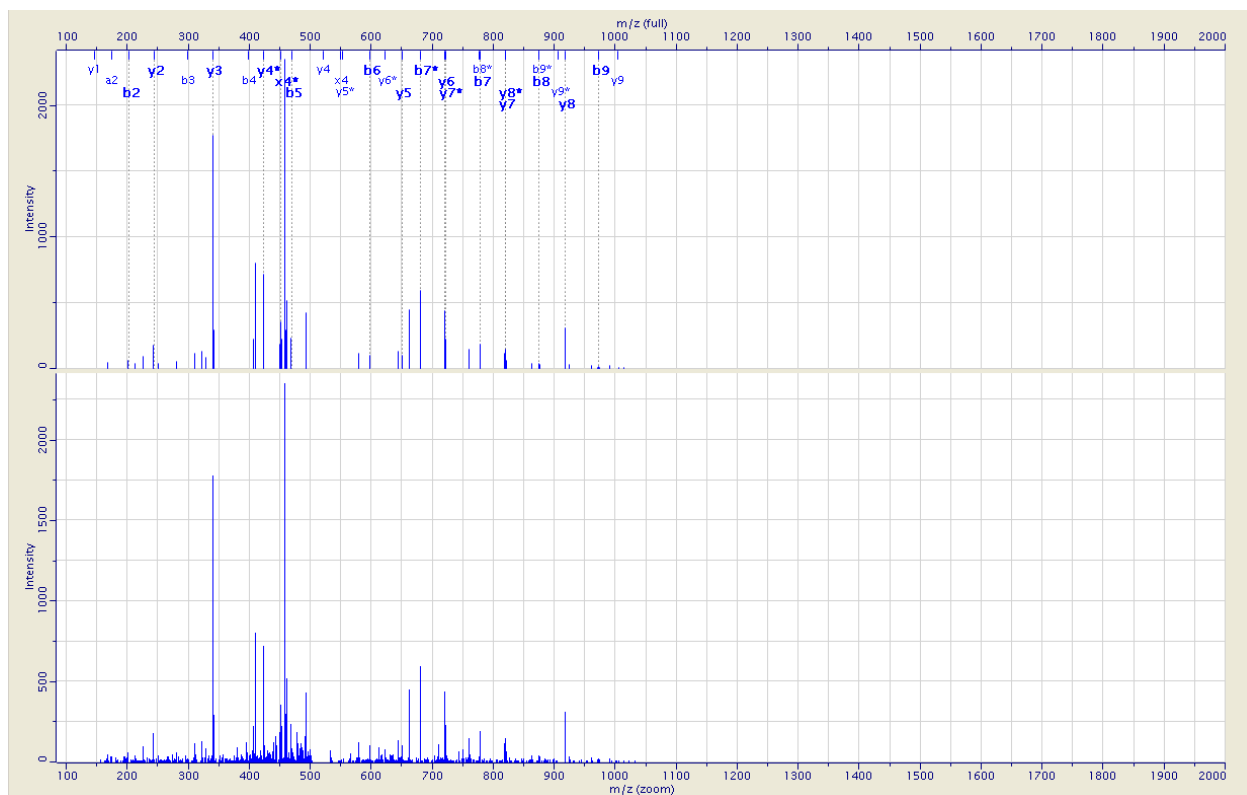

Spectrum as presented by MaxQuant. The lower panel represents the raw spectrum, while the upper one represents the peak list submitted to MASCOT. Ions matched are shown in bold and connected by dashed lines to the corresponding peak. \* neutral loss

|                                             |                         |
|---------------------------------------------|-------------------------|
| <b>Protein Name</b>                         | Prkaca                  |
| <b>UniProt ID (IPI)</b>                     | P05132                  |
| <b>Modified Peptide Sequence identified</b> | TWT(ph)LCGTPEYLAPEIILSK |
| <b>Precursor m/z</b>                        | 758.03722               |
| <b>Mass error (ppm)</b>                     | 0.55619                 |
| <b>Charge</b>                               | 3                       |
| <b>Mascot Score</b>                         | 53.07                   |
| <b>PTM Score</b>                            | 124.06                  |
| <b>False Positive Rate (FPR)</b>            | 8.46E-08                |

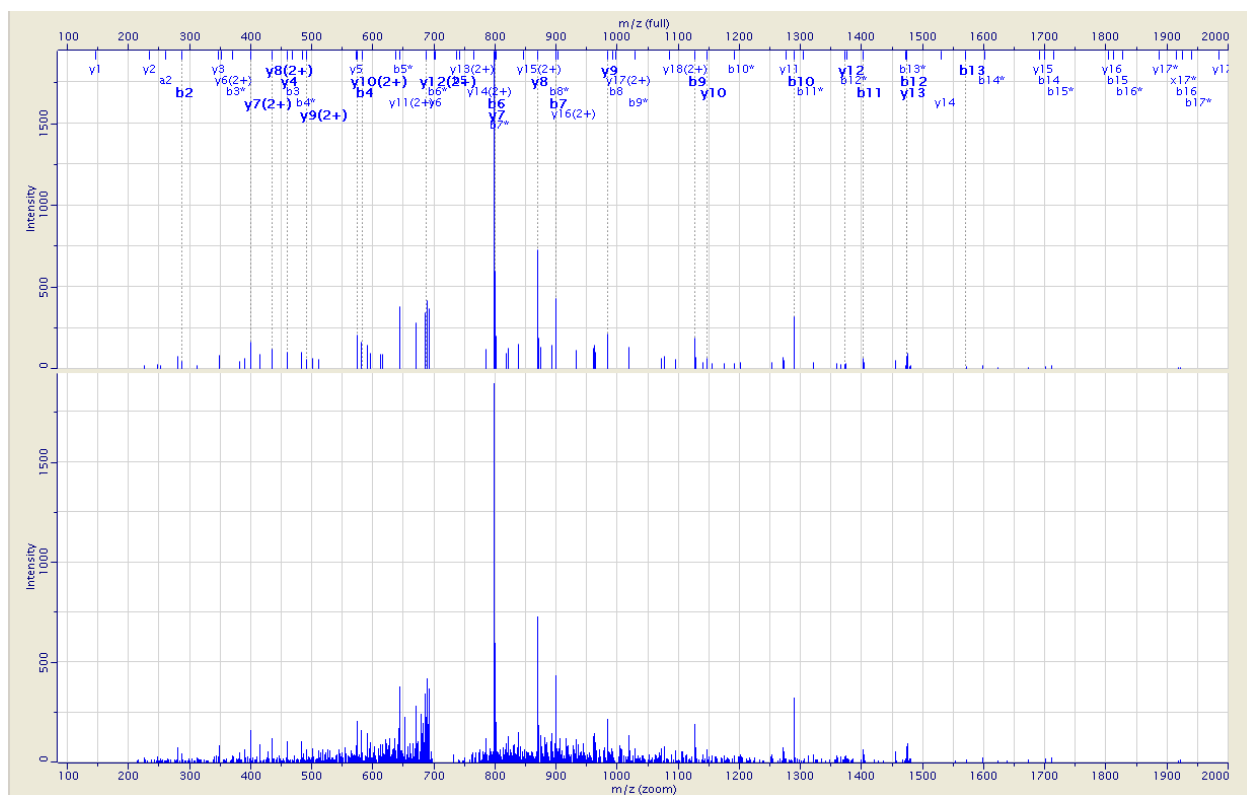

Spectrum as presented by MaxQuant. The lower panel represents the raw spectrum, while the upper one represents the peak list submitted to MASCOT. Ions matched are shown in bold and connected by dashed lines to the corresponding peak. \* neutral loss

|                                             |              |
|---------------------------------------------|--------------|
| <b>Protein Name</b>                         | PRAS40       |
| <b>UniProt ID (IPI)</b>                     | Q9D1F4       |
| <b>Modified Peptide Sequence identified</b> | LNT(ph)SDFQK |
| <b>Precursor m/z</b>                        | 516.72352    |
| <b>Mass error (ppm)</b>                     | 0.05347      |
| <b>Charge</b>                               | 2            |
| <b>Mascot Score</b>                         | 36.06        |
| <b>PTM Score</b>                            | 128.52       |
| <b>False Positive Rate (FPR)</b>            | 2.12E-03     |

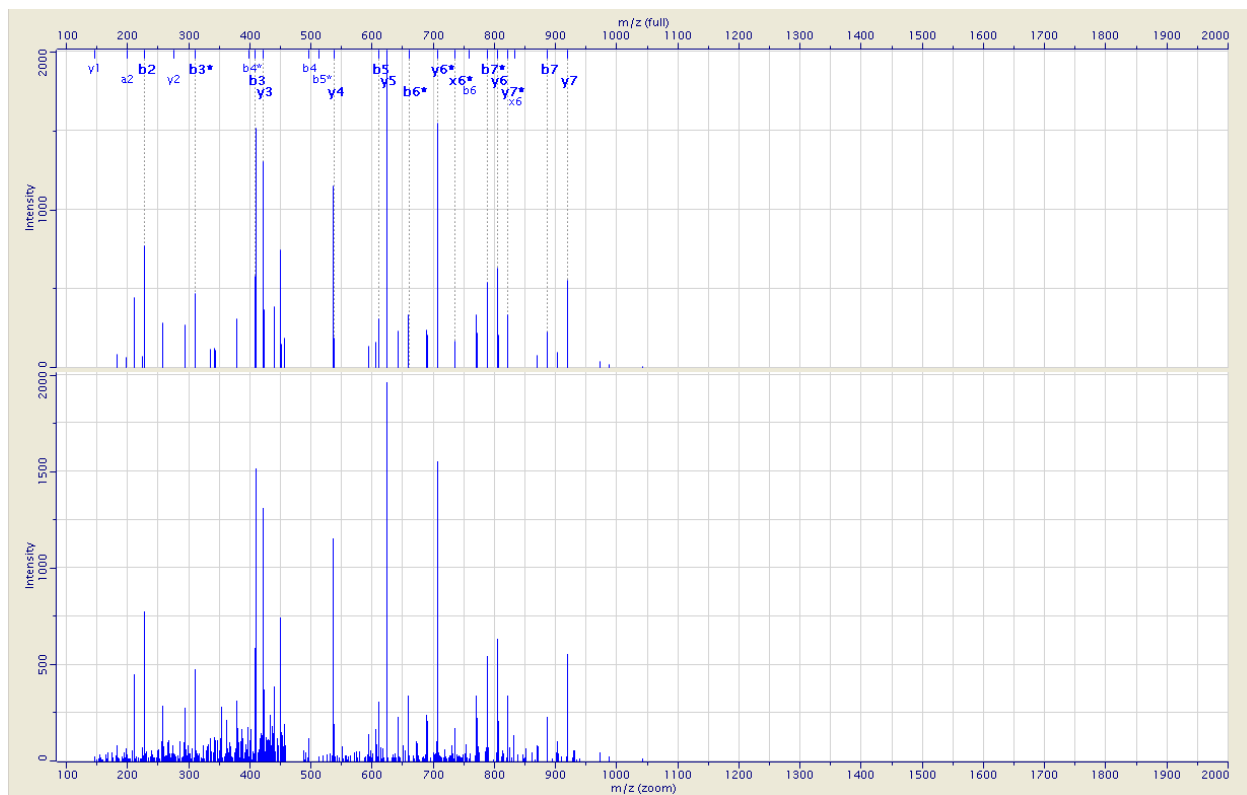

Spectrum as presented by MaxQuant. The lower panel represents the raw spectrum, while the upper one represents the peak list submitted to MASCOT. Ions matched are shown in bold and connected by dashed lines to the corresponding peak. \* neutral loss

|                                             |                            |
|---------------------------------------------|----------------------------|
| <b>Protein Name</b>                         | Stat3                      |
| <b>UniProt ID (IPI)</b>                     | P42227                     |
| <b>Modified Peptide Sequence identified</b> | YCRPESQEHPEADPGSAAPY(ph)LK |
| <b>Precursor m/z</b>                        | 861.3721                   |
| <b>Mass error (ppm)</b>                     | 0.051412                   |
| <b>Charge</b>                               | 3                          |
| <b>Mascot Score</b>                         | 20.9                       |
| <b>PTM Score</b>                            | 58.111                     |
| <b>False Positive Rate (FPR)</b>            | 0.011901                   |

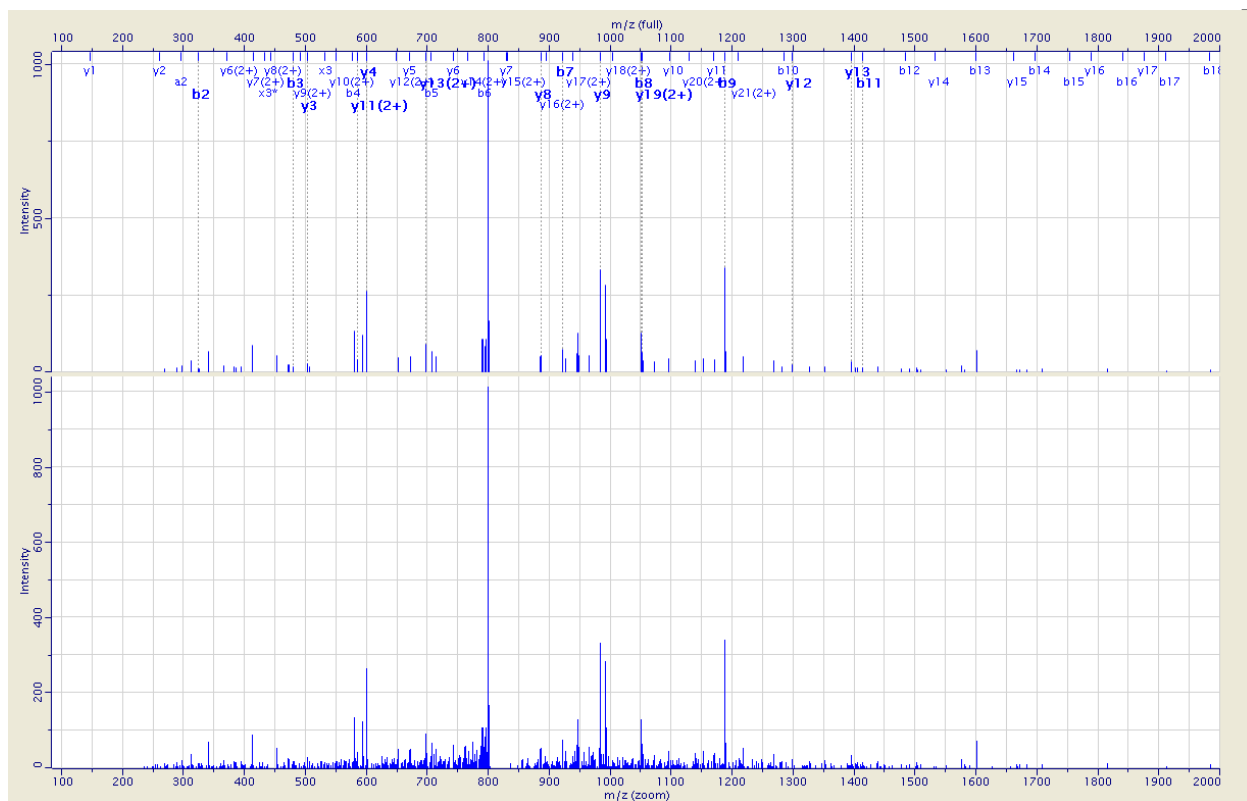

Spectrum as presented by MaxQuant. The lower panel represents the raw spectrum, while the upper one represents the peak list submitted to MASCOT. Ions matched are shown in bold and connected by dashed lines to the corresponding peak. \* neutral loss

|                                             |                |
|---------------------------------------------|----------------|
| <b>Protein Name</b>                         | Tsc2           |
| <b>UniProt ID (IPI)</b>                     | Q61037         |
| <b>Modified Peptide Sequence identified</b> | SIS(ph)VSEHVVR |
| <b>Precursor m/z</b>                        | 596.78973      |
| <b>Mass error (ppm)</b>                     | -0.29224       |
| <b>Charge</b>                               | 2              |
| <b>Mascot Score</b>                         | 40.9           |
| <b>PTM Score</b>                            | 147.5          |
| <b>False Positive Rate (FPR)</b>            | 1.43E-06       |

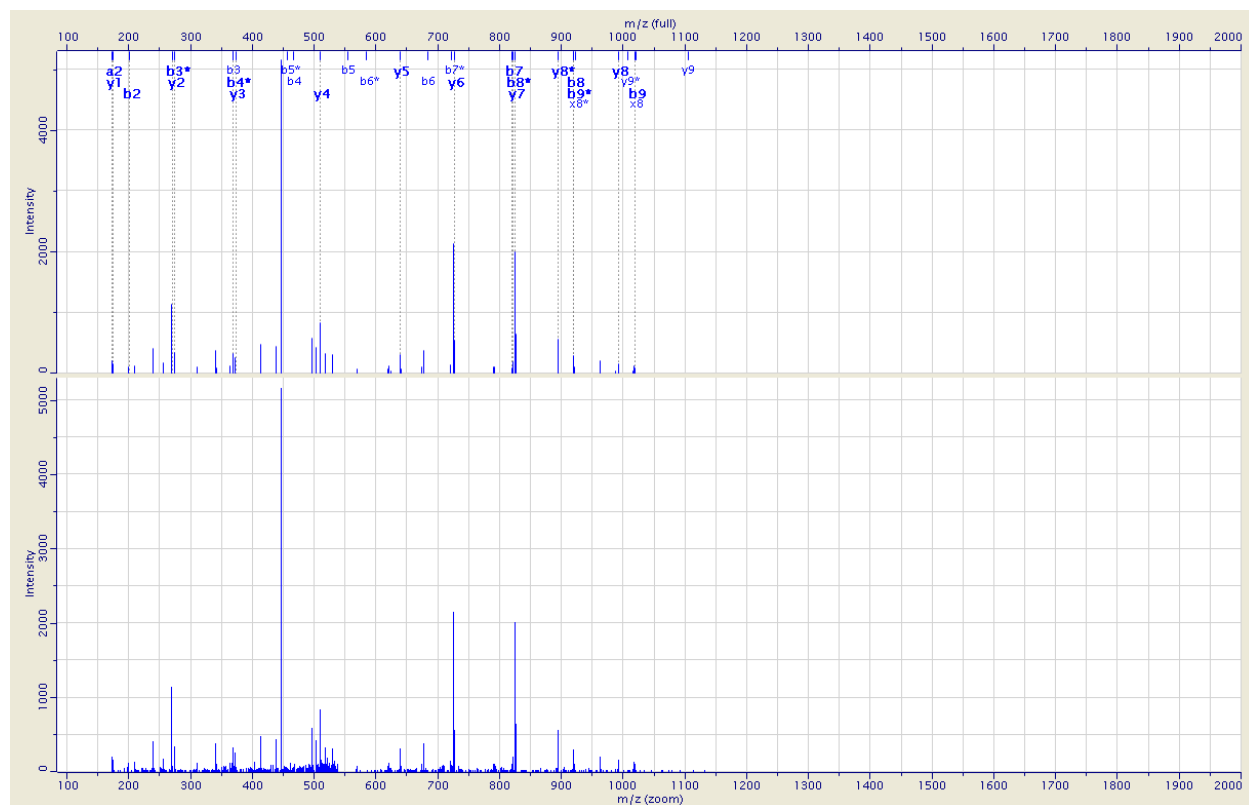

Spectrum as presented by MaxQuant. The lower panel represents the raw spectrum, while the upper one represents the peak list submitted to MASCOT. Ions matched are shown in bold and connected by dashed lines to the corresponding peak. \* neutral loss

|                                    |           |
|------------------------------------|-----------|
| <b>Protein Name</b>                | Jun       |
| <b>UniProt ID (IPI)</b>            | Q9D1F4    |
| <b>Peptide Sequence identified</b> | LASPELER  |
| <b>Precursor m/z</b>               | 457.75072 |
| <b>Mass error (ppm)</b>            | 0.37157   |
| <b>Charge</b>                      | 2         |
| <b>Mascot Score</b>                | 42.87     |
| <b>False Positive Rate (FPR)</b>   | 0.021142  |

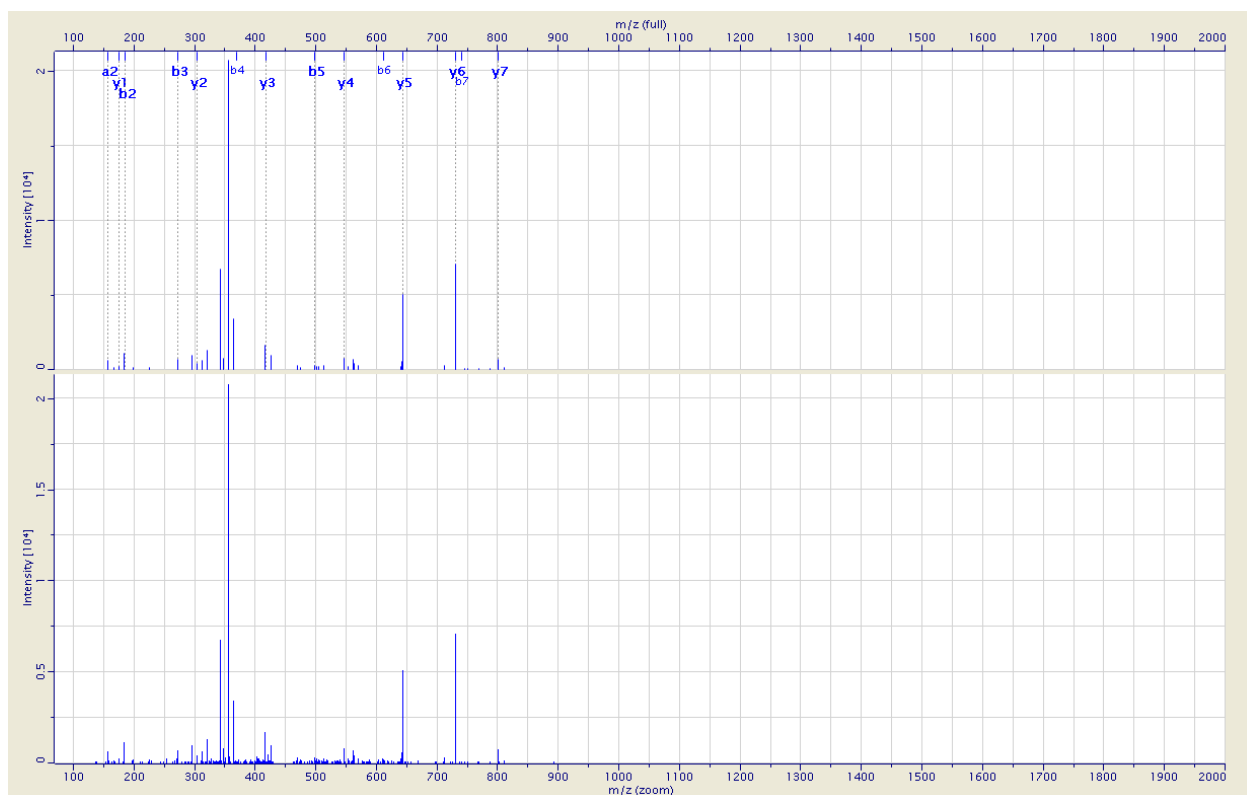

Spectrum as presented by MaxQuant. The lower panel represents the raw spectrum, while the upper one represents the peak list submitted to MASCOT. Ions matched are shown in bold and connected by dashed lines to the corresponding peak.

|                                    |                 |
|------------------------------------|-----------------|
| <b>Protein Name</b>                | Cep57           |
| <b>UniProt ID (IPI)</b>            | Q8CEE0          |
| <b>Peptide Sequence identified</b> | HNQELASQLVAAENK |
| <b>Precursor m/z</b>               | 551.28479       |
| <b>Mass error (ppm)</b>            | -0.25223        |
| <b>Charge</b>                      | 3               |
| <b>Mascot Score</b>                | 78.27           |
| <b>False Positive Rate (FPR)</b>   | 7.42E-31        |

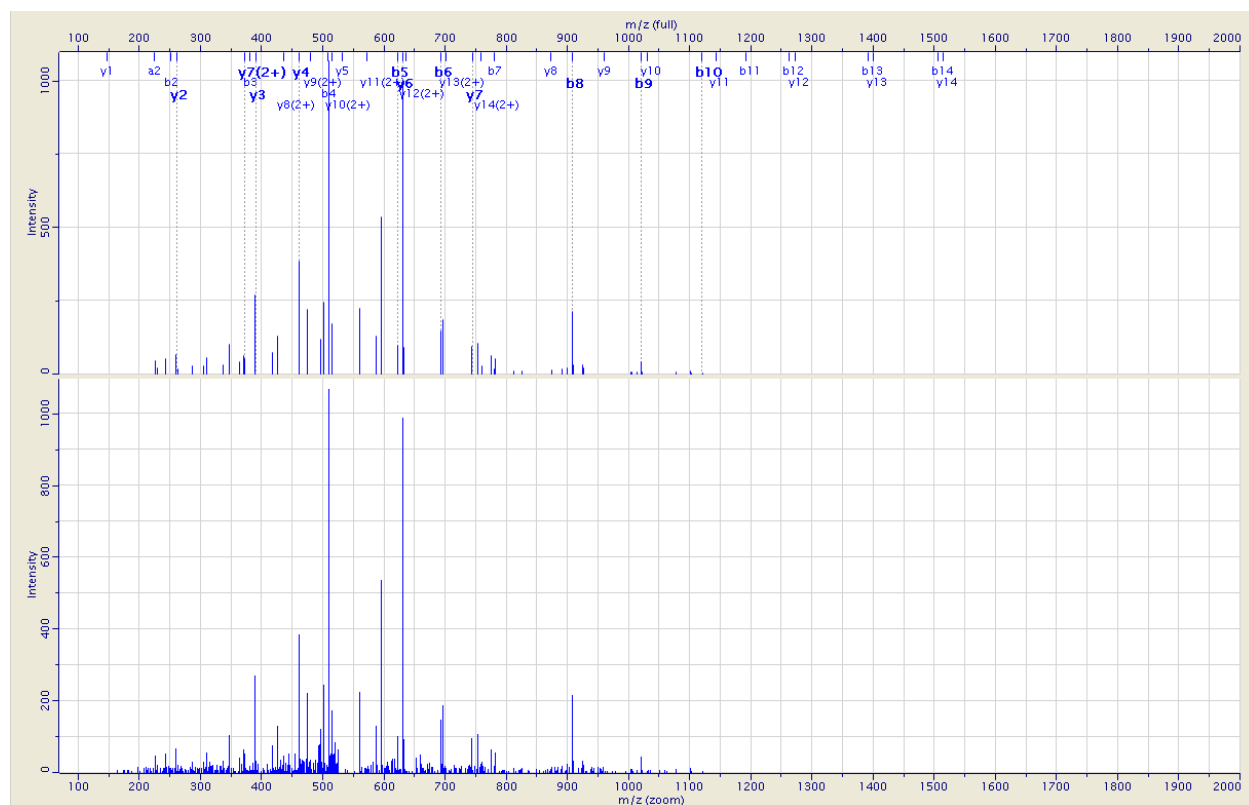

Spectrum as presented by MaxQuant. The lower panel represents the raw spectrum, while the upper one represents the peak list submitted to MASCOT. Ions matched are shown in bold and connected by dashed lines to the corresponding peak.

|                                    |           |
|------------------------------------|-----------|
| <b>Protein Name</b>                | Tgfb1i1   |
| <b>UniProt ID (IPI)</b>            | Q62219    |
| <b>Peptide Sequence identified</b> | DFLQLFAPR |
| <b>Precursor m/z</b>               | 553.80329 |
| <b>Mass error (ppm)</b>            | -0.041859 |
| <b>Charge</b>                      | 2         |
| <b>Mascot Score</b>                | 53.64     |
| <b>False Positive Rate (FPR)</b>   | 5.02E-3   |

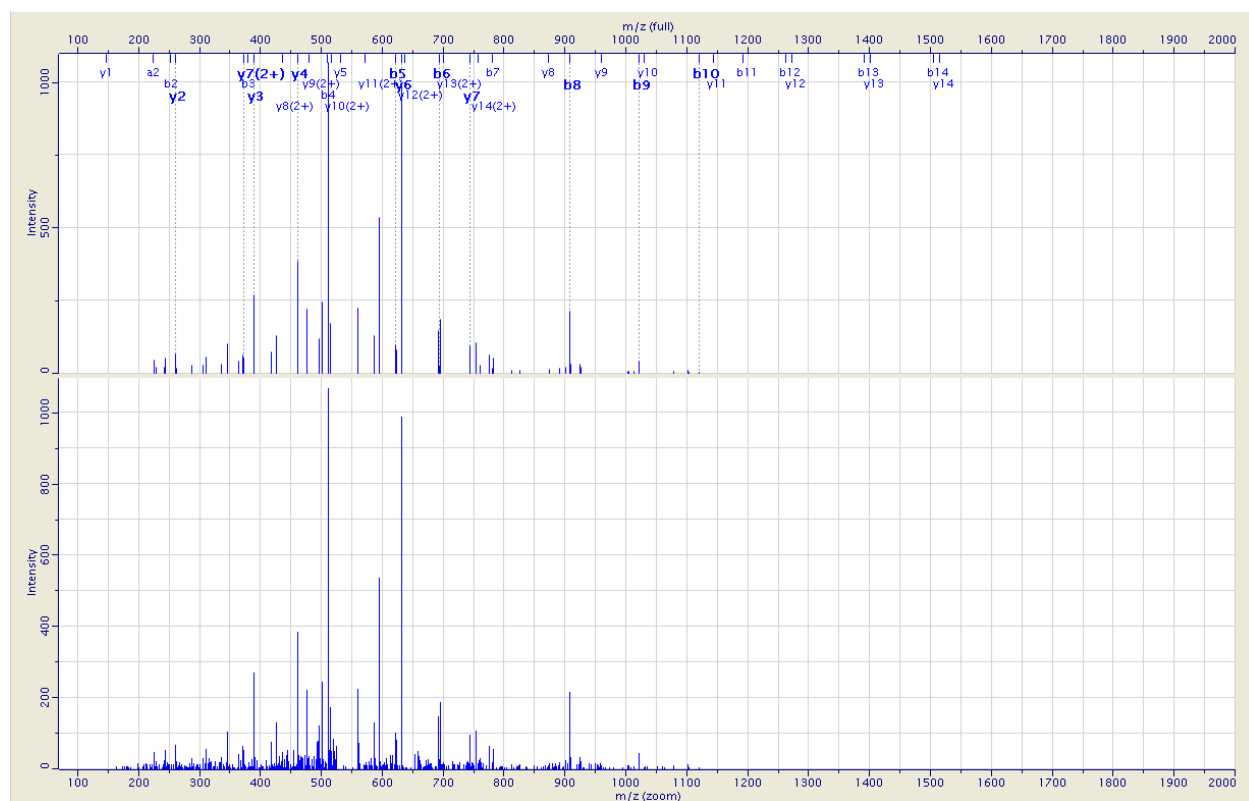

Spectrum as presented by MaxQuant. The lower panel represents the raw spectrum, while the upper one represents the peak list submitted to MASCOT. Ions matched are shown in bold and connected by dashed lines to the corresponding peak.

|                                    |                |
|------------------------------------|----------------|
| <b>Protein Name</b>                | Smad5          |
| <b>UniProt ID (IPI)</b>            | P97454         |
| <b>Peptide Sequence identified</b> | VLTQMGSPNPISVS |
| <b>Precursor m/z</b>               | 823.42691      |
| <b>Mass error (ppm)</b>            | -0.19864       |
| <b>Charge</b>                      | 2              |
| <b>Mascot Score</b>                | 39.79          |
| <b>False Positive Rate (FPR)</b>   | 1.43E-3        |



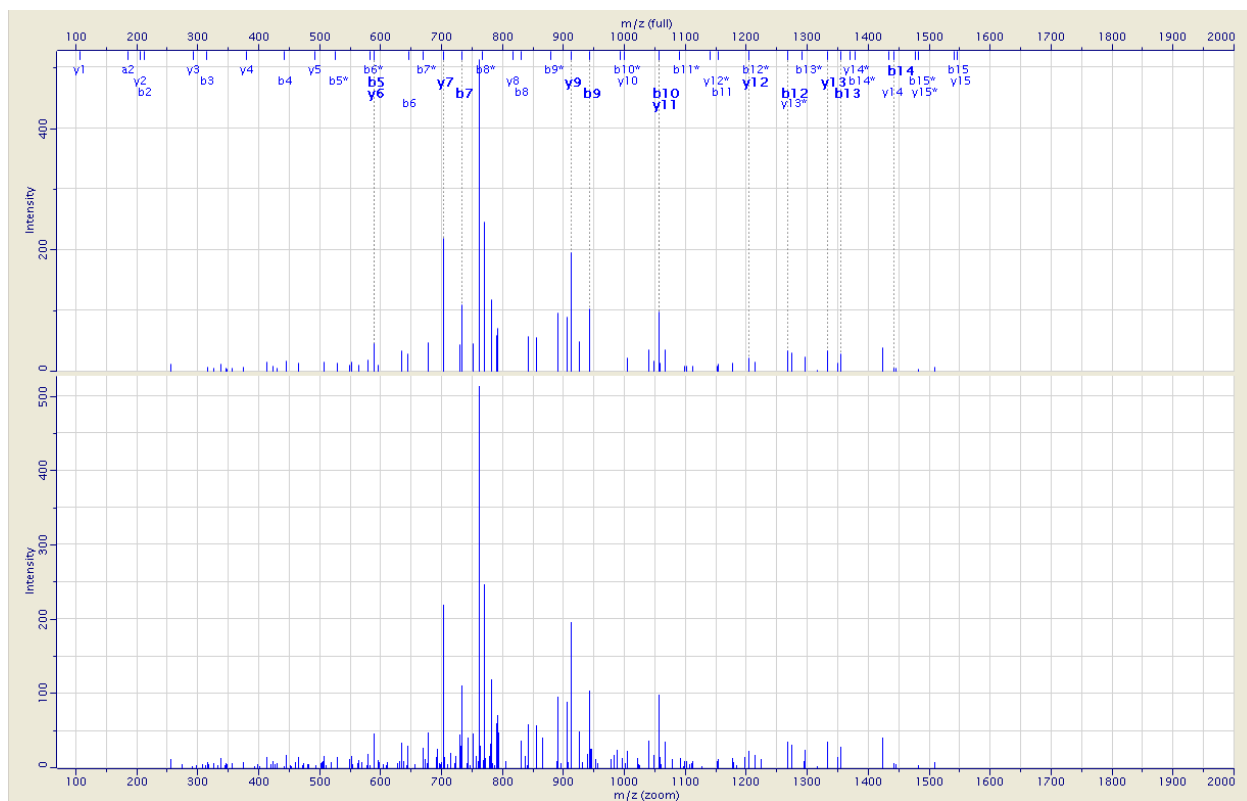

Spectrum as presented by MaxQuant. The lower panel represents the raw spectrum, while the upper one represents the peak list submitted to MASCOT. Ions matched are shown in bold and connected by dashed lines to the corresponding peak.

|                                    |           |
|------------------------------------|-----------|
| <b>Protein Name</b>                | Ahr       |
| <b>UniProt ID (IPI)</b>            | P30561    |
| <b>Peptide Sequence identified</b> | NNDLYNIMR |
| <b>Precursor m/z</b>               | 576.77695 |
| <b>Mass error (ppm)</b>            | -0.36117  |
| <b>Charge</b>                      | 2         |
| <b>Mascot Score</b>                | 60.99     |
| <b>False Positive Rate (FPR)</b>   | 3.27E-3   |

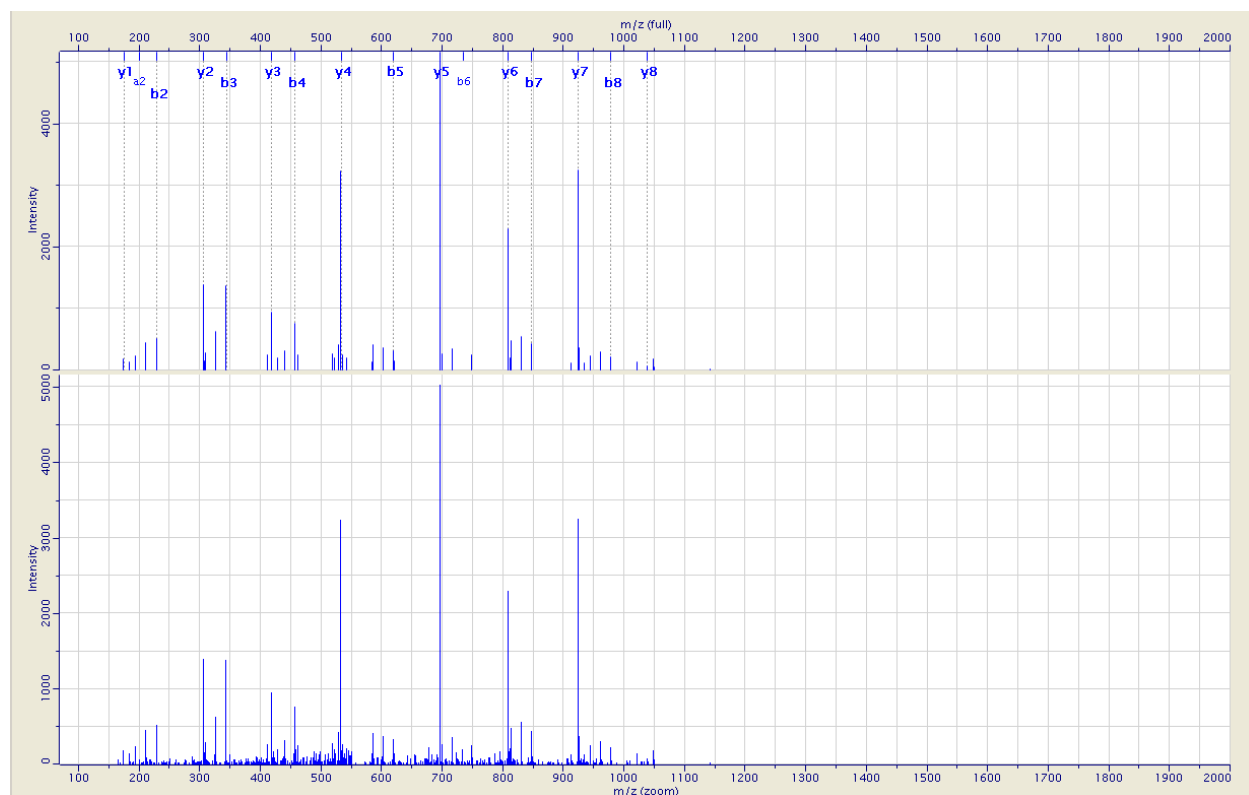

Spectrum as presented by MaxQuant. The lower panel represents the raw spectrum, while the upper one represents the peak list submitted to MASCOT. Ions matched are shown in bold and connected by dashed lines to the corresponding peak.

|                                    |                     |
|------------------------------------|---------------------|
| <b>Protein Name</b>                | Flrt3               |
| <b>UniProt ID (IPI)</b>            | Q6ZPQ1              |
| <b>Peptide Sequence identified</b> | LGHSPAFGSITETIVTGER |
| <b>Precursor m/z</b>               | 658.00933           |
| <b>Mass error (ppm)</b>            | -0.76472            |
| <b>Charge</b>                      | 3                   |
| <b>Mascot Score</b>                | 26.43               |
| <b>False Positive Rate (FPR)</b>   | 3.50E-3             |

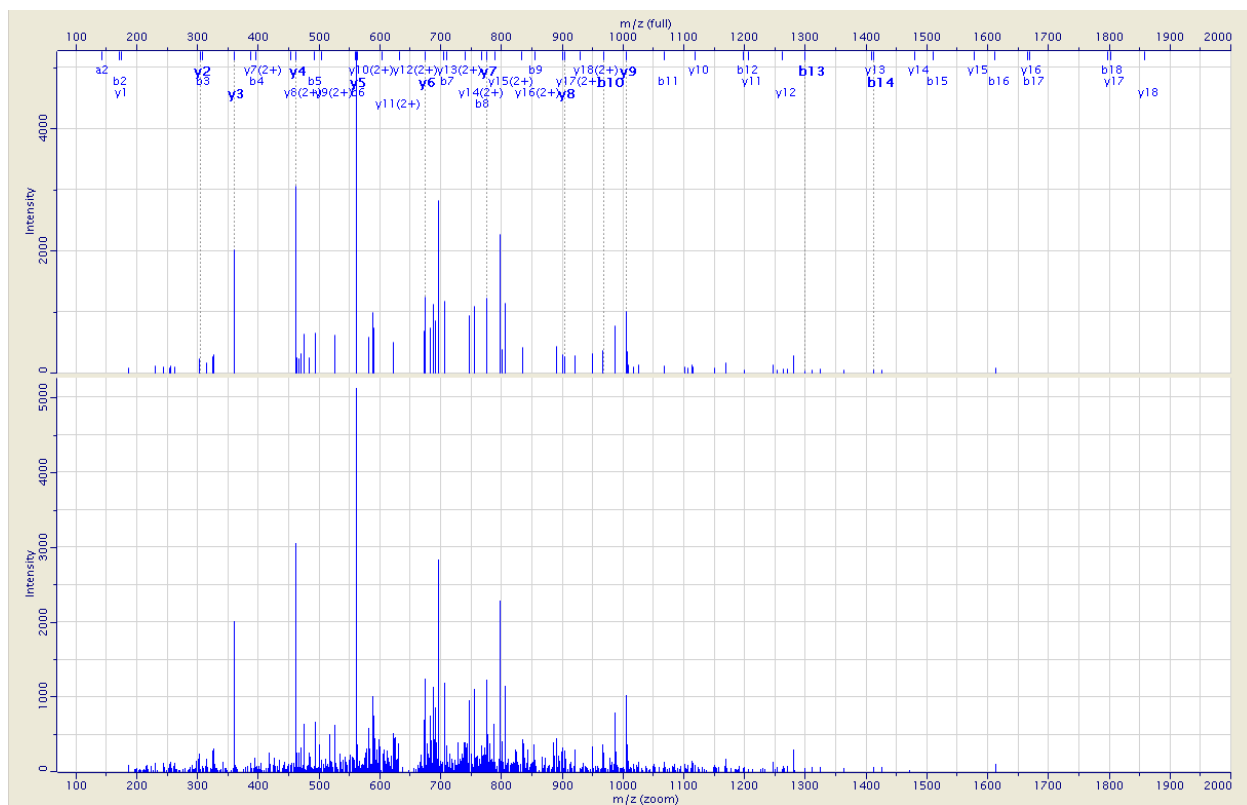

Spectrum as presented by MaxQuant. The lower panel represents the raw spectrum, while the upper one represents the peak list submitted to MASCOT. Ions matched are shown in bold and connected by dashed lines to the corresponding peak.

|                                    |             |
|------------------------------------|-------------|
| <b>Protein Name</b>                | Tes         |
| <b>UniProt ID (IPI)</b>            | P47226      |
| <b>Peptide Sequence identified</b> | FPSEMNAQGDK |
| <b>Precursor m/z</b>               | 612.2717    |
| <b>Mass error (ppm)</b>            | 2.6655      |
| <b>Charge</b>                      | 2           |
| <b>Mascot Score</b>                | 27.76       |
| <b>False Positive Rate (FPR)</b>   | 1.45E-2     |

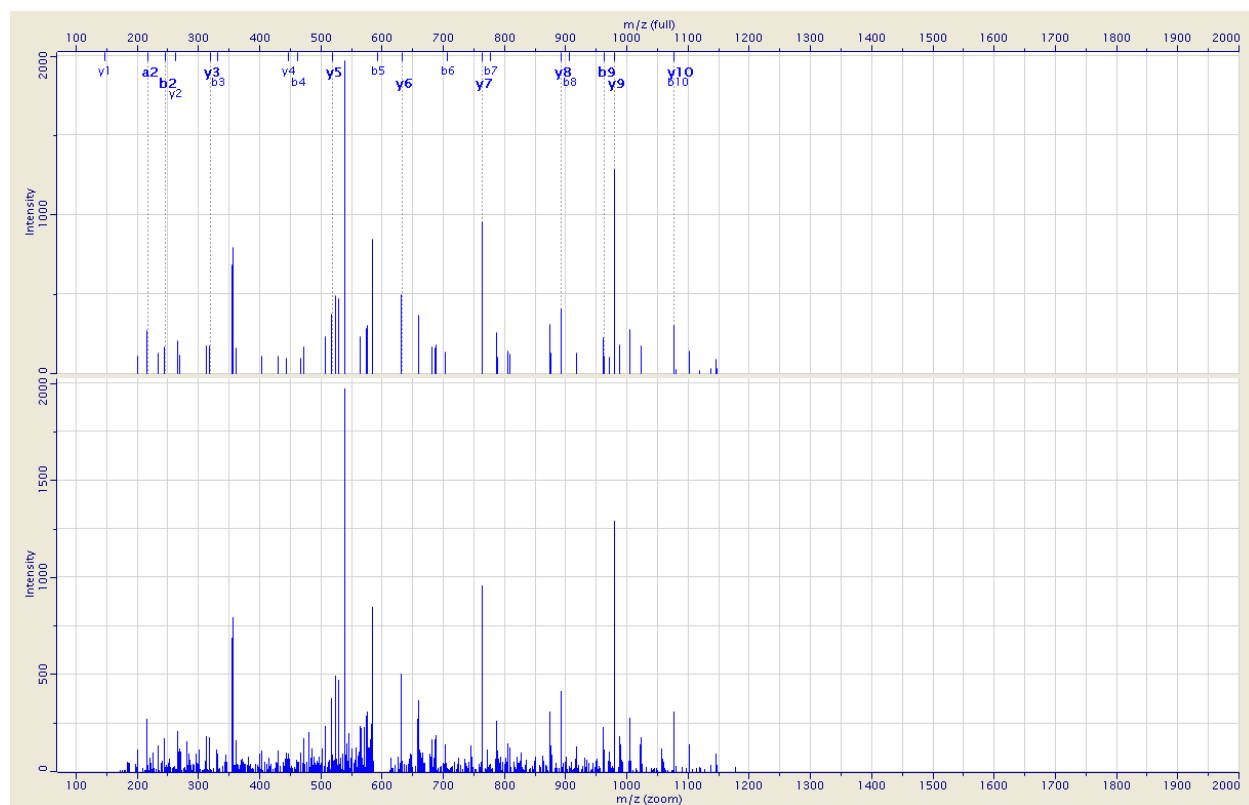

Spectrum as presented by MaxQuant. The lower panel represents the raw spectrum, while the upper one represents the peak list submitted to MASCOT. Ions matched are shown in bold and connected by dashed lines to the corresponding peak.

|                                    |            |
|------------------------------------|------------|
| <b>Protein Name</b>                | Nubpl      |
| <b>UniProt ID (IPI)</b>            | Q9CWD8     |
| <b>Peptide Sequence identified</b> | THIFGADGAR |
| <b>Precursor m/z</b>               | 348.84556  |
| <b>Mass error (ppm)</b>            | 0.048874   |
| <b>Charge</b>                      | 3          |
| <b>Mascot Score</b>                | 27.62      |
| <b>False Positive Rate (FPR)</b>   | 4.44E-2    |

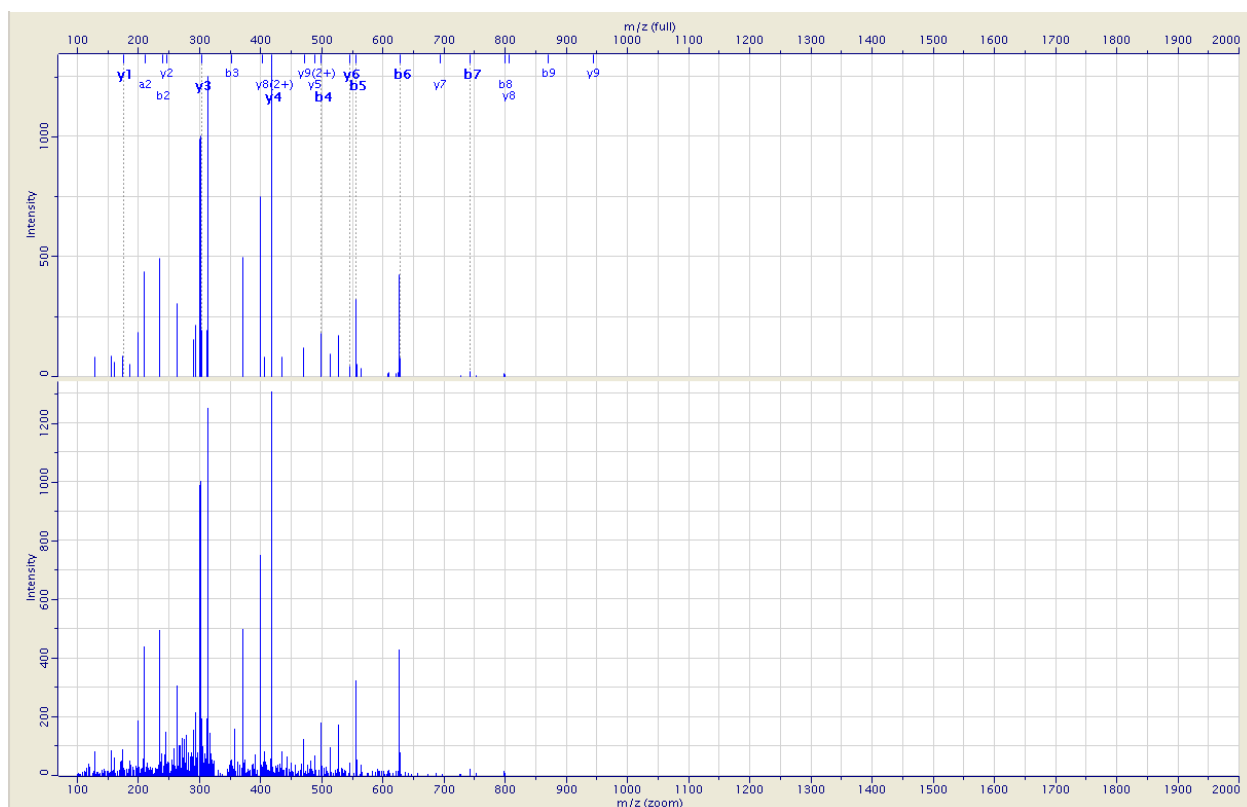

Spectrum as presented by MaxQuant. The lower panel represents the raw spectrum, while the upper one represents the peak list submitted to MASCOT. Ions matched are shown in bold and connected by dashed lines to the corresponding peak.

|                                    |                       |
|------------------------------------|-----------------------|
| <b>Protein Name</b>                | Sfrs11                |
| <b>UniProt ID (IPI)</b>            | Q3TR16                |
| <b>Peptide Sequence identified</b> | FHDPDSAVVAQHLTNTVFVDR |
| <b>Precursor m/z</b>               | 790.06086             |
| <b>Mass error (ppm)</b>            | 0.12529               |
| <b>Charge</b>                      | 3                     |
| <b>Mascot Score</b>                | 67.16                 |
| <b>False Positive Rate (FPR)</b>   | 1.14E-26              |

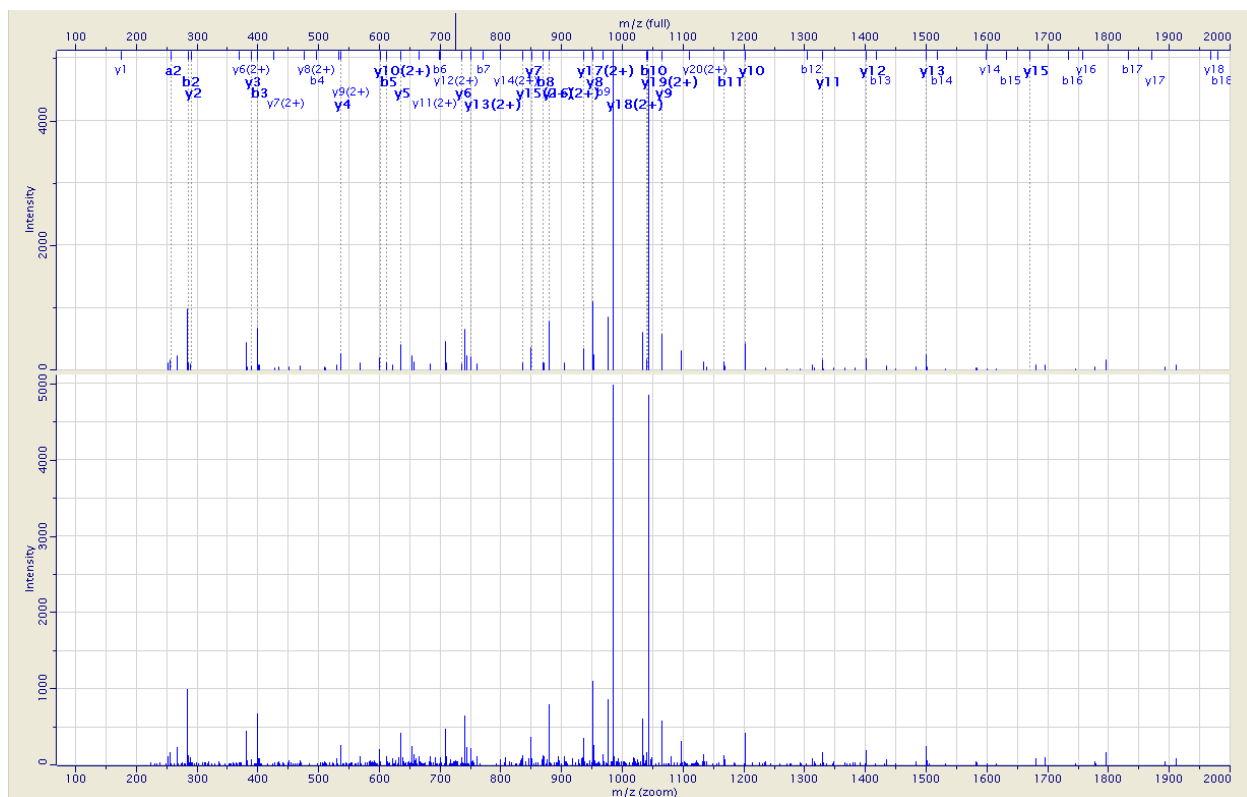

Spectrum as presented by MaxQuant. The lower panel represents the raw spectrum, while the upper one represents the peak list submitted to MASCOT. Ions matched are shown in bold and connected by dashed lines to the corresponding peak.

|                                    |            |
|------------------------------------|------------|
| <b>Protein Name</b>                | Krit1      |
| <b>UniProt ID (IPI)</b>            | Q6S5J6     |
| <b>Peptide Sequence identified</b> | QGFLNEETLK |
| <b>Precursor m/z</b>               | 589.80623  |
| <b>Mass error (ppm)</b>            | 2.6363     |
| <b>Charge</b>                      | 2          |
| <b>Mascot Score</b>                | 41.72      |
| <b>False Positive Rate (FPR)</b>   | 4.57E-3    |

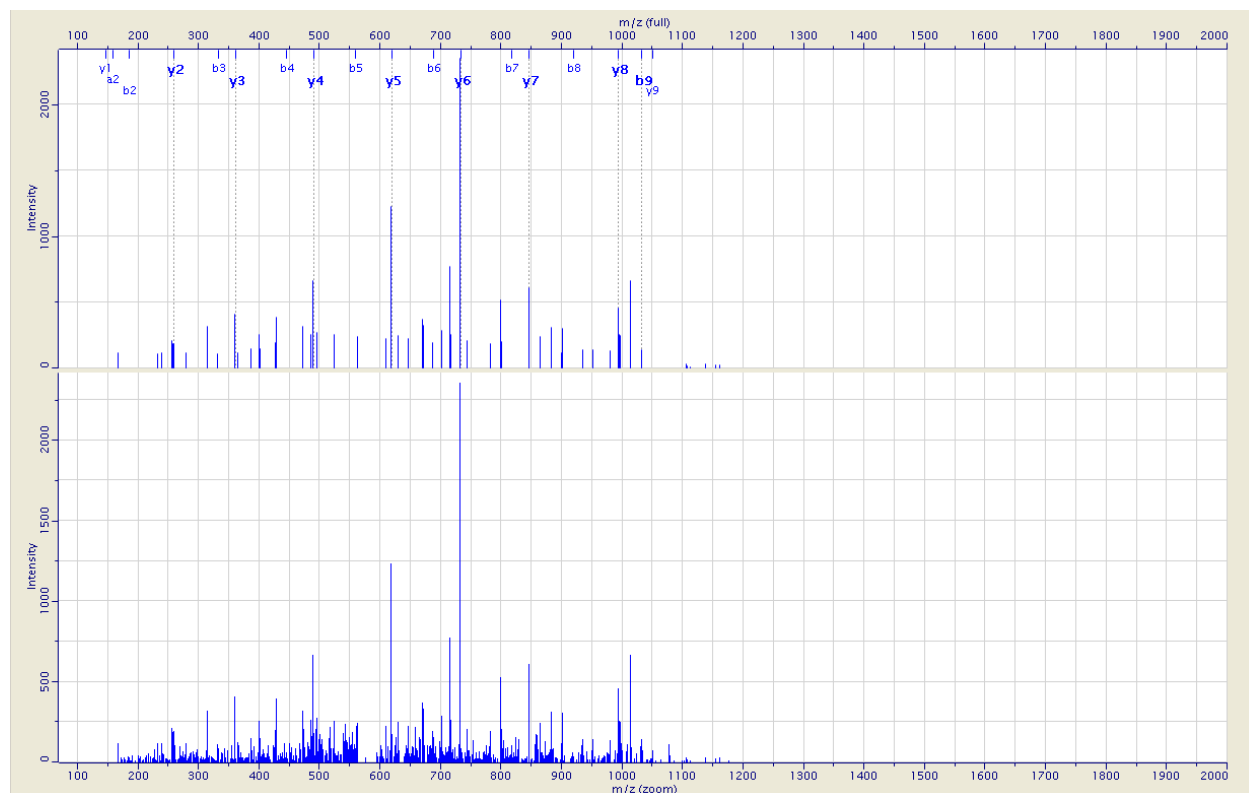

Spectrum as presented by MaxQuant. The lower panel represents the raw spectrum, while the upper one represents the peak list submitted to MASCOT. Ions matched are shown in bold and connected by dashed lines to the corresponding peak.

|                                    |           |
|------------------------------------|-----------|
| <b>Protein Name</b>                | Smc5      |
| <b>UniProt ID (IPI)</b>            | Q8CG46    |
| <b>Peptide Sequence identified</b> | KVELDEYR  |
| <b>Precursor m/z</b>               | 526.27456 |
| <b>Mass error (ppm)</b>            | -0.42629  |
| <b>Charge</b>                      | 2         |
| <b>Mascot Score</b>                | 47.72     |
| <b>False Positive Rate (FPR)</b>   | 8.15E-3   |

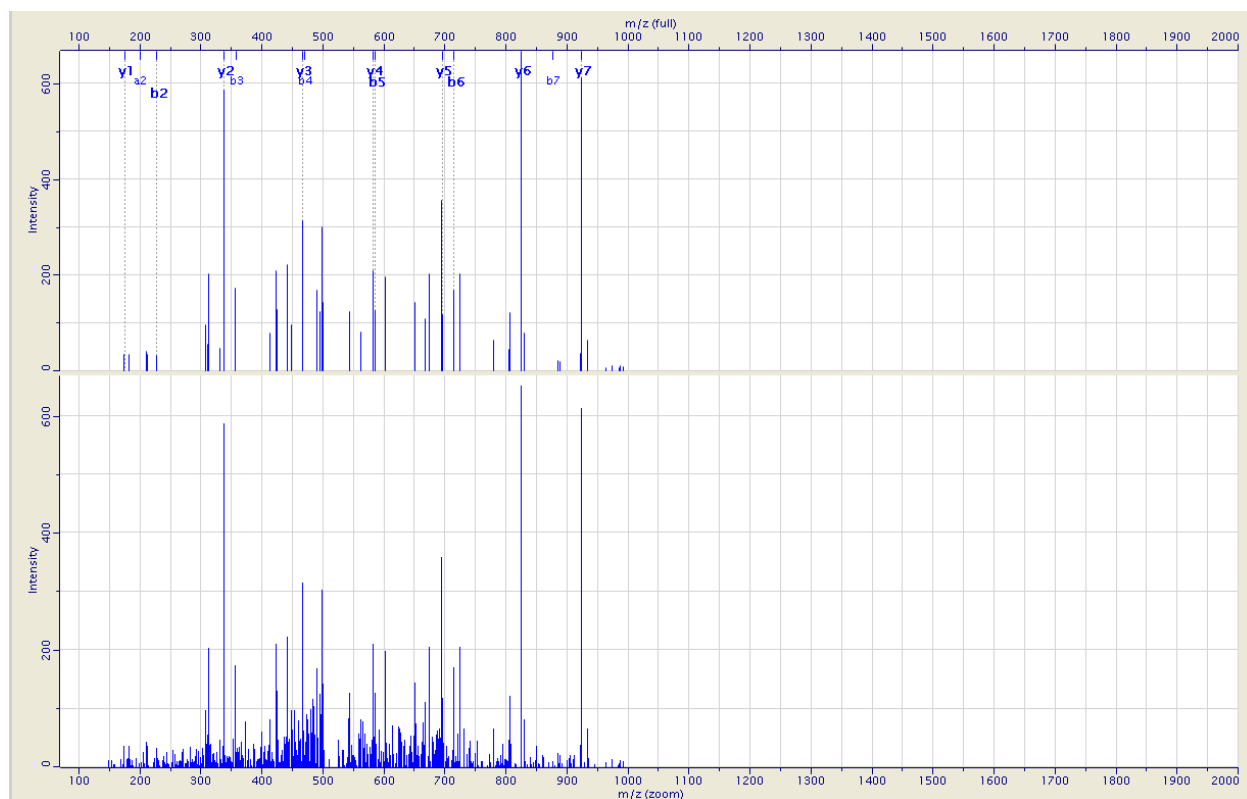

Spectrum as presented by MaxQuant. The lower panel represents the raw spectrum, while the upper one represents the peak list submitted to MASCOT. Ions matched are shown in bold and connected by dashed lines to the corresponding peak.

|                                    |             |
|------------------------------------|-------------|
| <b>Protein Name</b>                | Serpinb13   |
| <b>UniProt ID (IPI)</b>            | Q8CDC0      |
| <b>Peptide Sequence identified</b> | HRESDSLFFGK |
| <b>Precursor m/z</b>               | 479.24913   |
| <b>Mass error (ppm)</b>            | -0.79107    |
| <b>Charge</b>                      | 3           |
| <b>Mascot Score</b>                | 34.22       |
| <b>False Positive Rate (FPR)</b>   | 1.94E-3     |



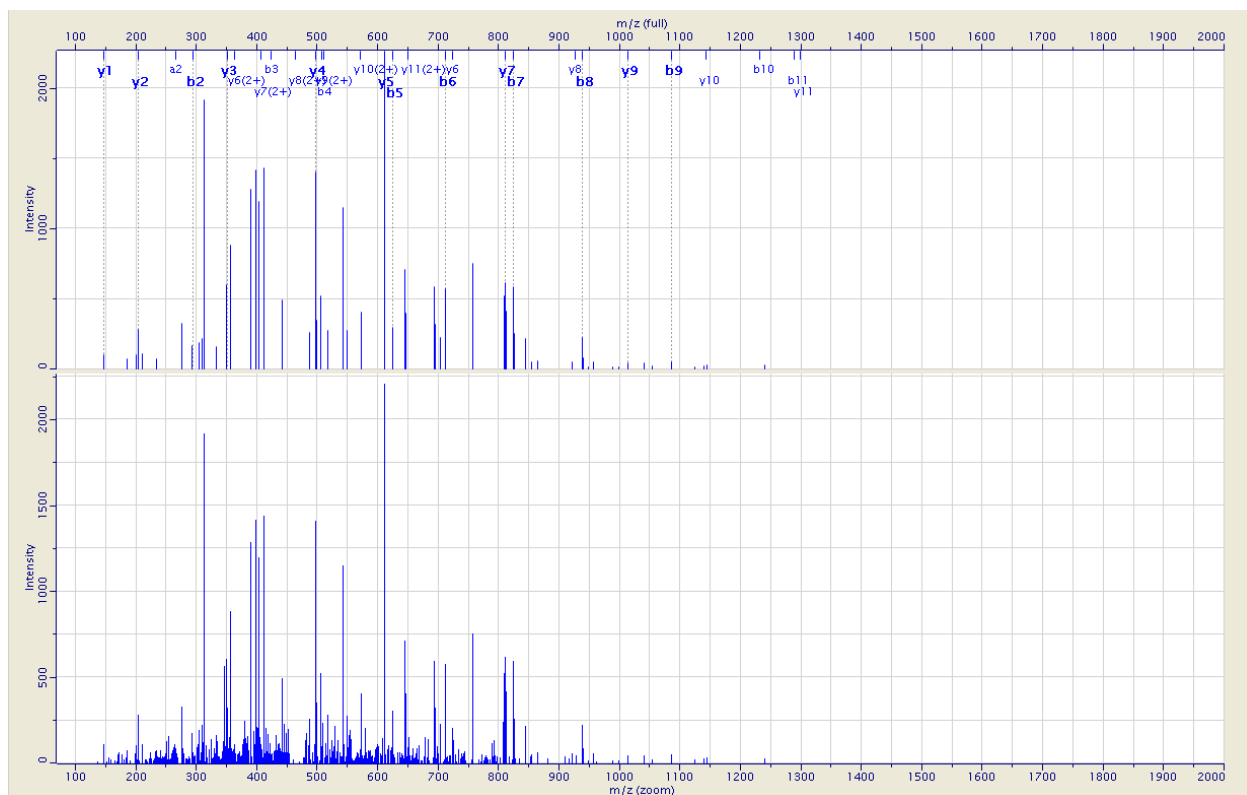

Spectrum as presented by MaxQuant. The lower panel represents the raw spectrum, while the upper one represents the peak list submitted to MASCOT. Ions matched are shown in bold and connected by dashed lines to the corresponding peak.

|                                    |                       |
|------------------------------------|-----------------------|
| <b>Protein Name</b>                | Hdac5                 |
| <b>UniProt ID (IPI)</b>            | Q9Z2V6                |
| <b>Peptide Sequence identified</b> | QQSTLIAVPLHGQSPLVTGER |
| <b>Precursor m/z</b>               | 744.4096              |
| <b>Mass error (ppm)</b>            | -0.34674              |
| <b>Charge</b>                      | 3                     |
| <b>Mascot Score</b>                | 31.05                 |
| <b>False Positive Rate (FPR)</b>   | 2.43E-3               |

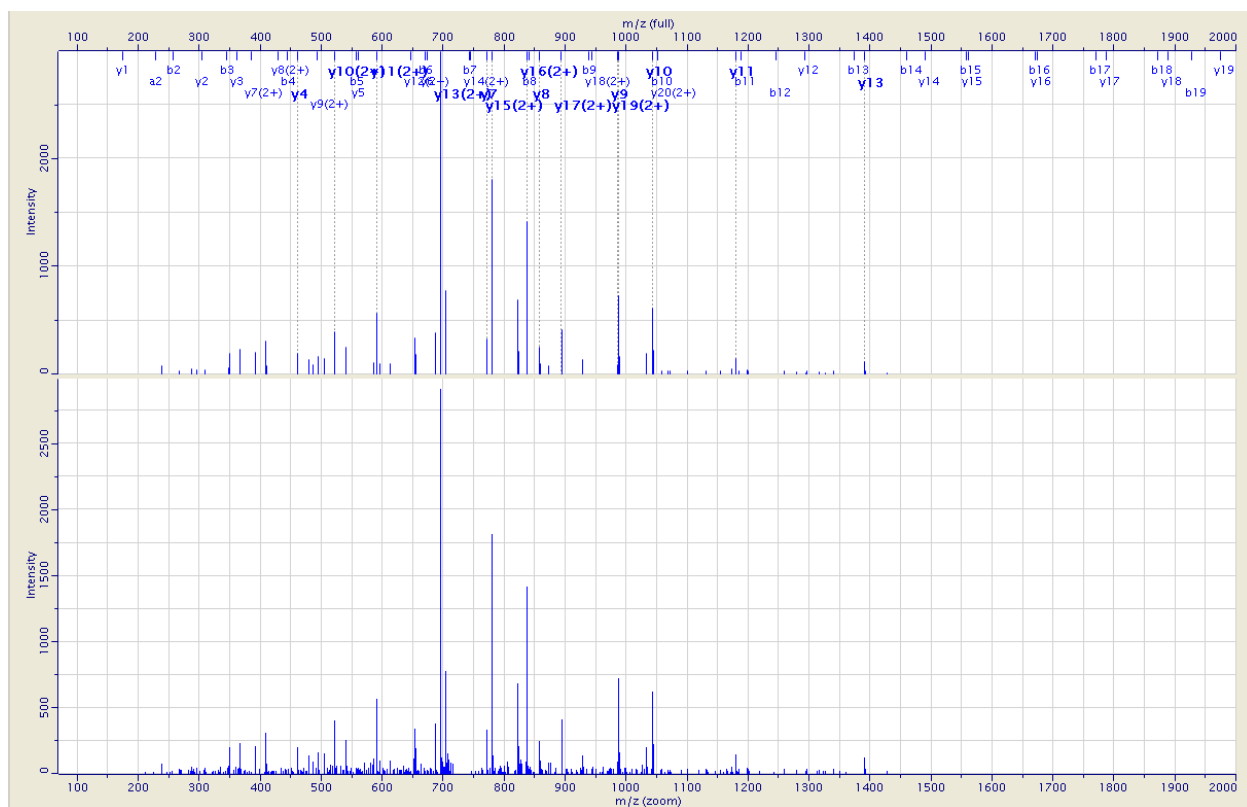

Spectrum as presented by MaxQuant. The lower panel represents the raw spectrum, while the upper one represents the peak list submitted to MASCOT. Ions matched are shown in bold and connected by dashed lines to the corresponding peak.

|                                    |             |
|------------------------------------|-------------|
| <b>Protein Name</b>                | Ecgf1       |
| <b>UniProt ID (IPI)</b>            | Q8VCL2      |
| <b>Peptide Sequence identified</b> | SAEQIVESIRR |
| <b>Precursor m/z</b>               | 429.90536   |
| <b>Mass error (ppm)</b>            | 0.67352     |
| <b>Charge</b>                      | 3           |
| <b>Mascot Score</b>                | 29.5        |
| <b>False Positive Rate (FPR)</b>   | 1.03E-2     |

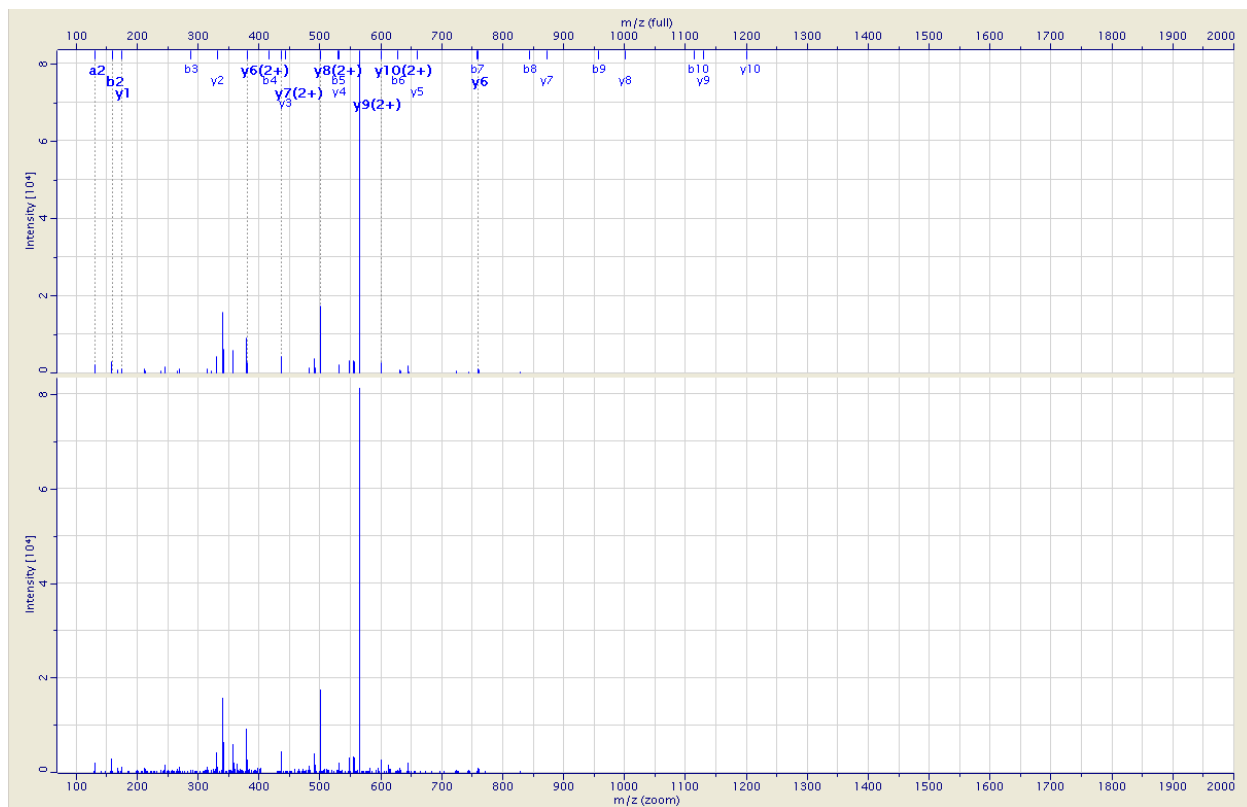

Spectrum as presented by MaxQuant. The lower panel represents the raw spectrum, while the upper one represents the peak list submitted to MASCOT. Ions matched are shown in bold and connected by dashed lines to the corresponding peak.

|                                    |                  |
|------------------------------------|------------------|
| <b>Protein Name</b>                | Cdh3             |
| <b>UniProt ID (IPI)</b>            | P10287           |
| <b>Peptide Sequence identified</b> | YEAWVPENEVGHEVQR |
| <b>Precursor m/z</b>               | 647.97451        |
| <b>Mass error (ppm)</b>            | 0.27703          |
| <b>Charge</b>                      | 3                |
| <b>Mascot Score</b>                | 42.97            |
| <b>False Positive Rate (FPR)</b>   | 4.46E-4          |

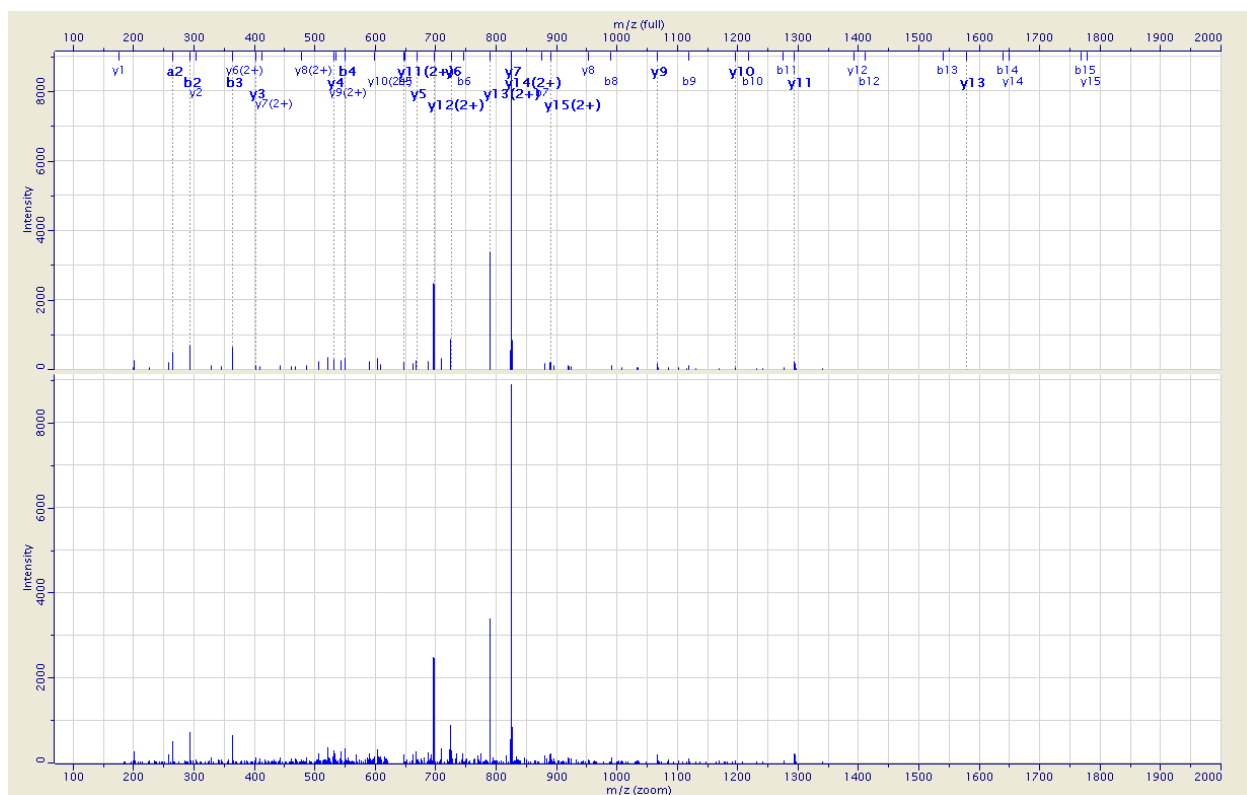

Spectrum as presented by MaxQuant. The lower panel represents the raw spectrum, while the upper one represents the peak list submitted to MASCOT. Ions matched are shown in bold and connected by dashed lines to the corresponding peak.

|                                    |           |
|------------------------------------|-----------|
| <b>Protein Name</b>                | Fcgrt     |
| <b>UniProt ID (IPI)</b>            | Q6i559    |
| <b>Peptide Sequence identified</b> | EQLFLEALK |
| <b>Precursor m/z</b>               | 545.81078 |
| <b>Mass error (ppm)</b>            | 0.78195   |
| <b>Charge</b>                      | 2         |
| <b>Mascot Score</b>                | 30.98     |
| <b>False Positive Rate (FPR)</b>   | 2.61E-2   |

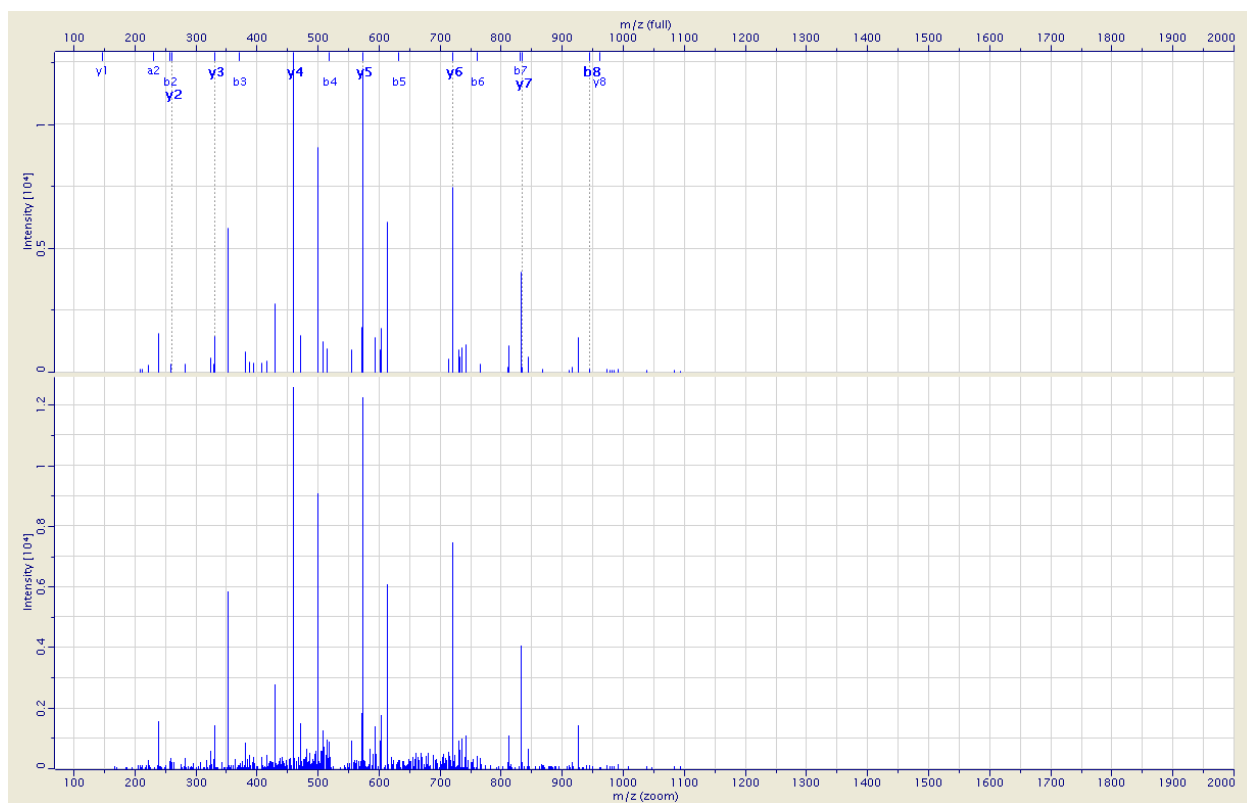

Spectrum as presented by MaxQuant. The lower panel represents the raw spectrum, while the upper one represents the peak list submitted to MASCOT. Ions matched are shown in bold and connected by dashed lines to the corresponding peak.

|                                    |              |
|------------------------------------|--------------|
| <b>Protein Name</b>                | Tacstd2      |
| <b>UniProt ID (IPI)</b>            | O55130       |
| <b>Peptide Sequence identified</b> | GDQSLRCDEVVR |
| <b>Precursor m/z</b>               | 478.5649     |
| <b>Mass error (ppm)</b>            | -0.16819     |
| <b>Charge</b>                      | 3            |
| <b>Mascot Score</b>                | 29.64        |
| <b>False Positive Rate (FPR)</b>   | 9.76E-3      |

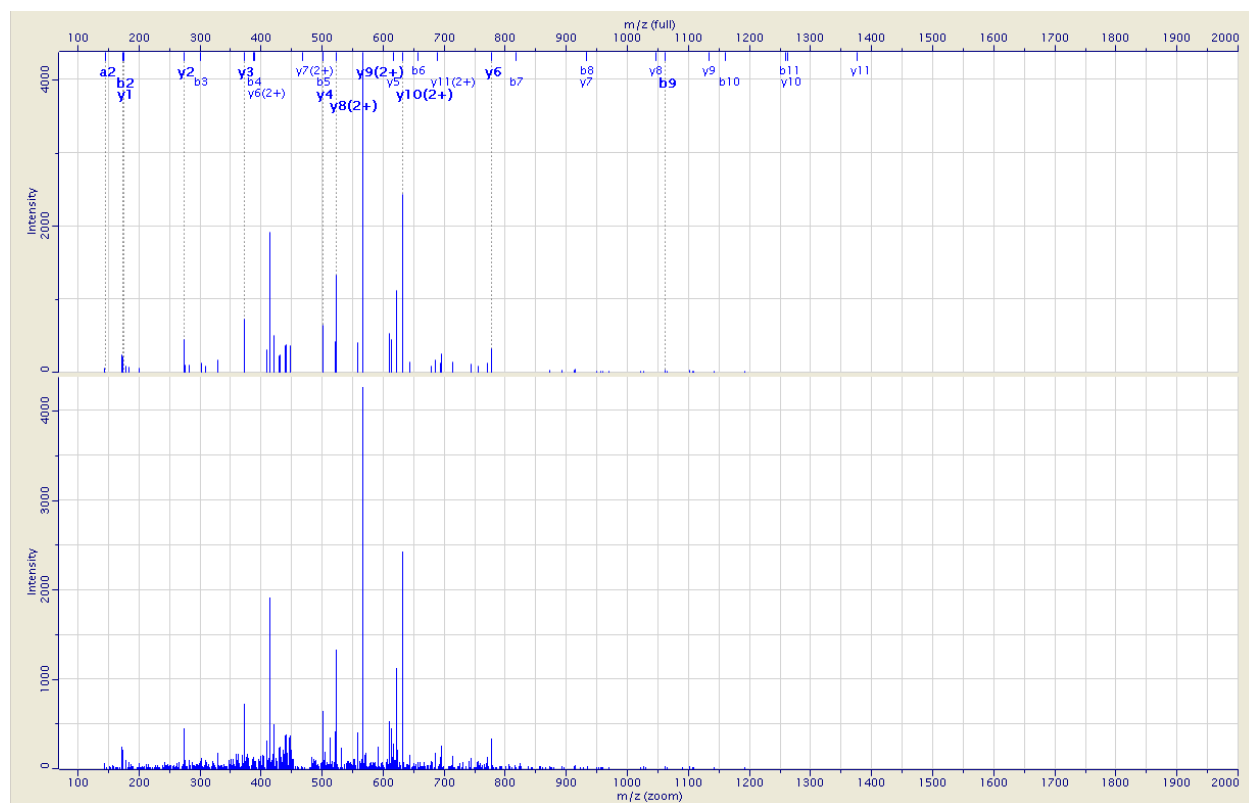

Spectrum as presented by MaxQuant. The lower panel represents the raw spectrum, while the upper one represents the peak list submitted to MASCOT. Ions matched are shown in bold and connected by dashed lines to the corresponding peak.

|                                    |            |
|------------------------------------|------------|
| <b>Protein Name</b>                | Ctsk       |
| <b>UniProt ID (IPI)</b>            | P55097     |
| <b>Peptide Sequence identified</b> | NSWGESWGNK |
| <b>Precursor m/z</b>               | 582.75707  |
| <b>Mass error (ppm)</b>            | 0.24089    |
| <b>Charge</b>                      | 2          |
| <b>Mascot Score</b>                | 41.43      |
| <b>False Positive Rate (FPR)</b>   | 4.77E-3    |

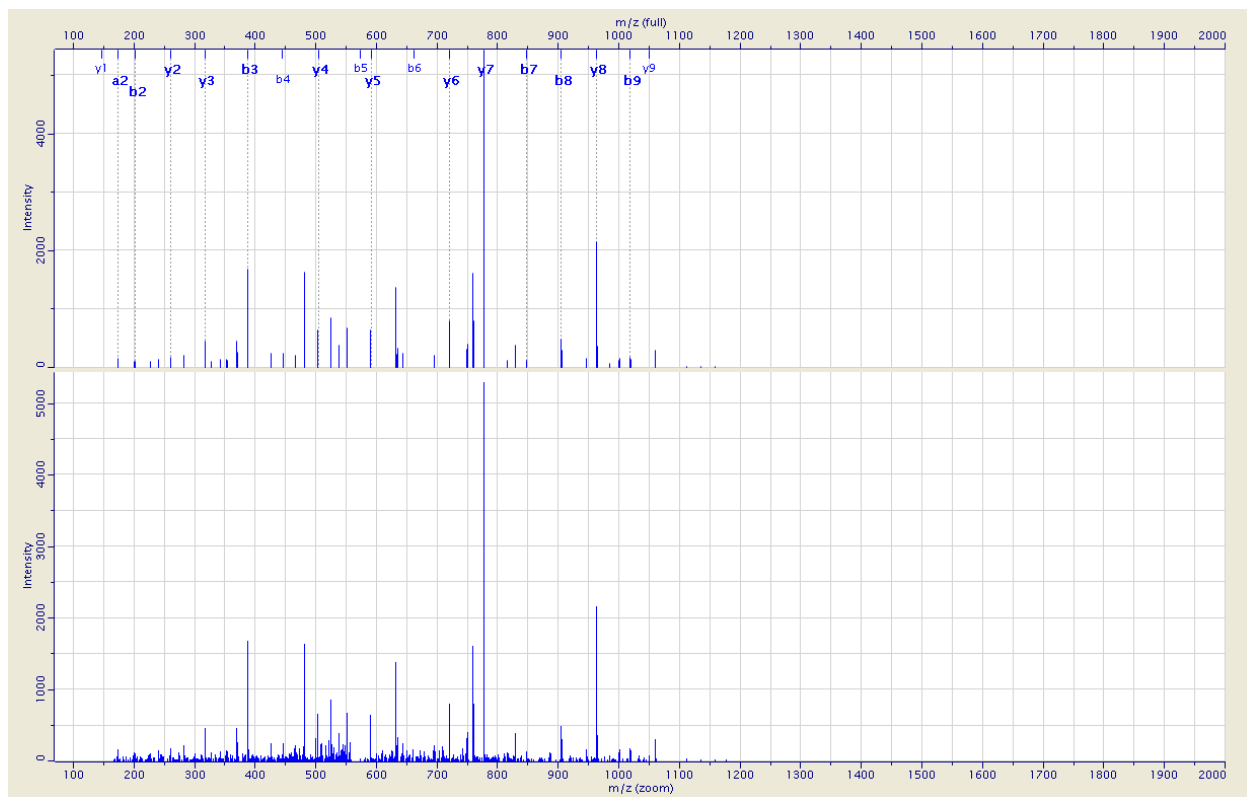

Spectrum as presented by MaxQuant. The lower panel represents the raw spectrum, while the upper one represents the peak list submitted to MASCOT. Ions matched are shown in bold and connected by dashed lines to the corresponding peak.

|                                    |                  |
|------------------------------------|------------------|
| <b>Protein Name</b>                | F10              |
| <b>UniProt ID (IPI)</b>            | O88947           |
| <b>Peptide Sequence identified</b> | FQRDTYDYDI AVL R |
| <b>Precursor m/z</b>               | 592.29681        |
| <b>Mass error (ppm)</b>            | -0.085065        |
| <b>Charge</b>                      | 3                |
| <b>Mascot Score</b>                | 28.05            |
| <b>False Positive Rate (FPR)</b>   | 4.50E-3          |

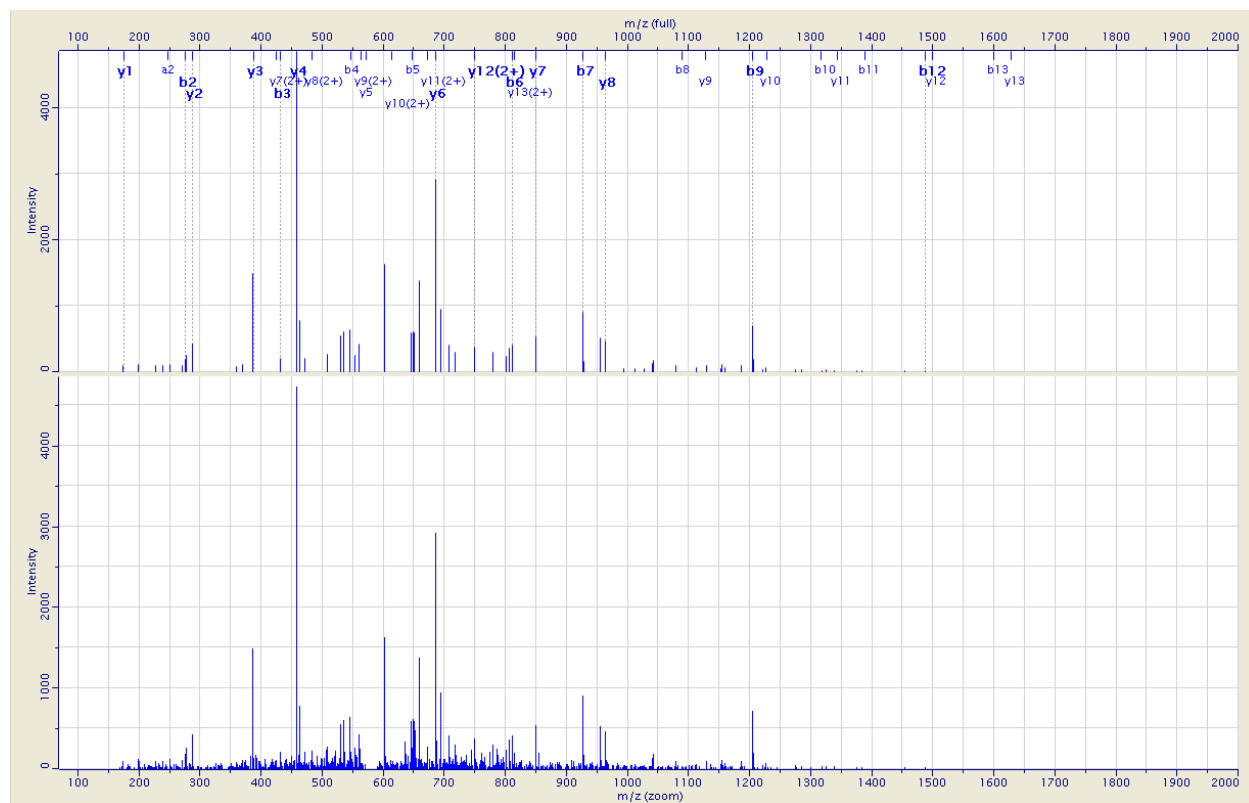

Spectrum as presented by MaxQuant. The lower panel represents the raw spectrum, while the upper one represents the peak list submitted to MASCOT. Ions matched are shown in bold and connected by dashed lines to the corresponding peak.
